# Supplementary material
Source: PubMed Central journal article supplement (PMC4634048)
Supplement: supp_pp.15.00493_00493revsupp.pdf [file supp_pp.15.00493_00493revsupp.pdf]

## Supplementary figures

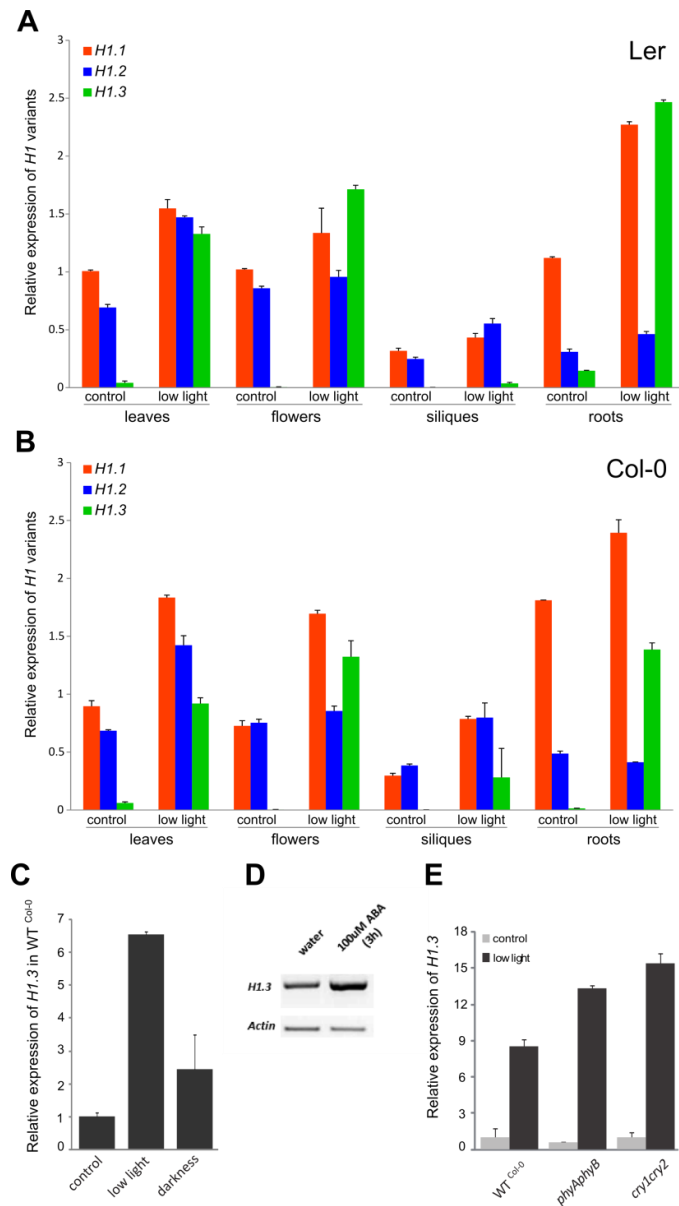

**Figure S1. Characterization of *H1.3* expression.** (A) Relative expression (RT-qPCR) of all *H1* variants in different tissues of Ler plants. (B) Relative expression (RT-qPCR) of all *H1* variants in different tissues of Col-0 plants. (C) Relative expression of *H1.3* in seedlings after four days of complete darkness compared with four days of limited light intensity during the day (low light) for Col-0 plants. (D) RT-PCR analysis of *h1.3* lines and *H1.3* transcript response to ABA treatment; *Actin* was used as a reference transcript. (E) Relative expression of *H1.3* in *phyAphyB* and *cry1cry2* mutants in control and 4-day low light conditions.

All qRT-PCR measurements were normalized to the expression of *UBC*. The plotted values are the means  $\pm$  SD for three replicates.

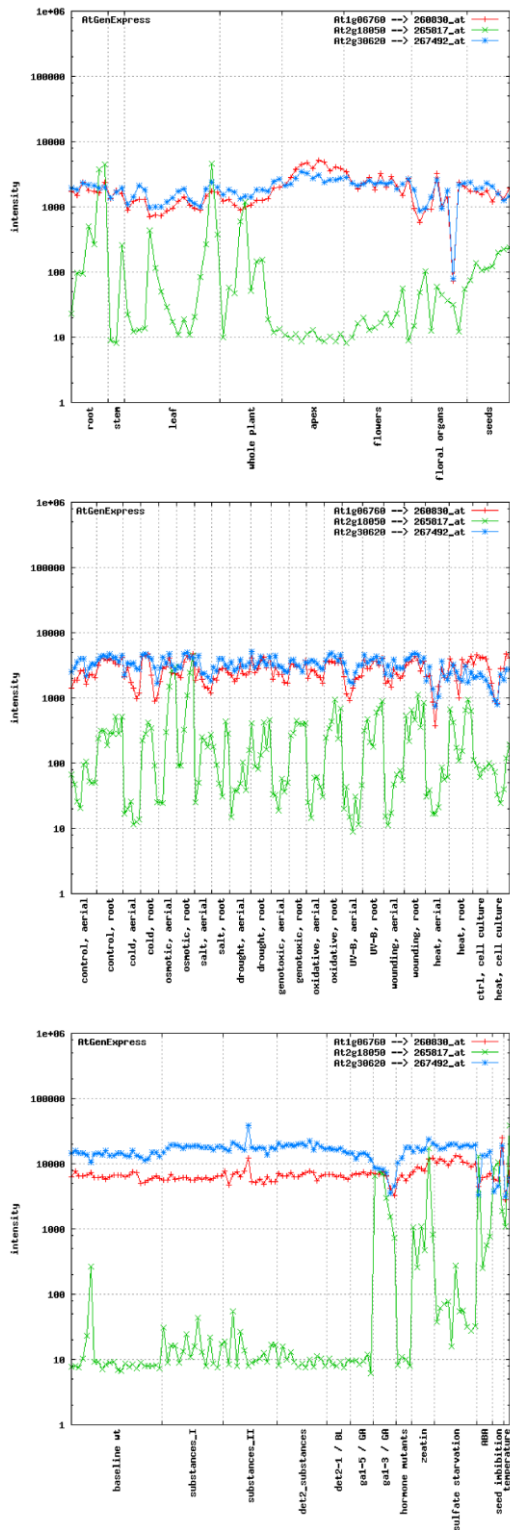

**Figure S2. Expression analysis of Arabidopsis H1s using microarray data (AtGeneExpression, (Kilian et al., 2007)).** The upper panel shows *H1* expression occurring in different organs. The middle panel illustrates the influence on *H1* transcription of various abiotic stresses and the bottom panel, the effect of other treatments as well as expression in mutants. Colour key: H1.1 – red; H1.2 – blue; H1.3 – green.

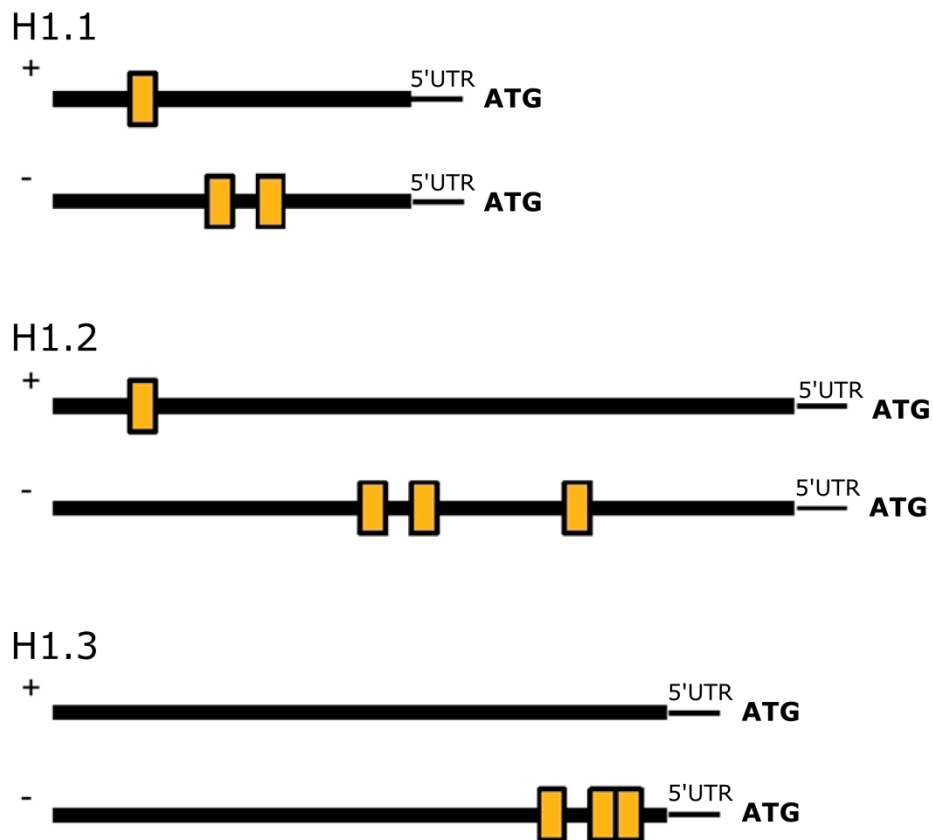

**Figure S3. Schematic representation of the promoter regions of genes encoding Arabidopsis histone H1 somatic variants.**

For each promoter the two complementary strands (+/-) are shown. Orange rectangles mark the location of ABRE motifs. The promoters are drawn approximately to scale. The 5'UTR sequences are not drawn to scale because no ABRE motifs were found in these regions.

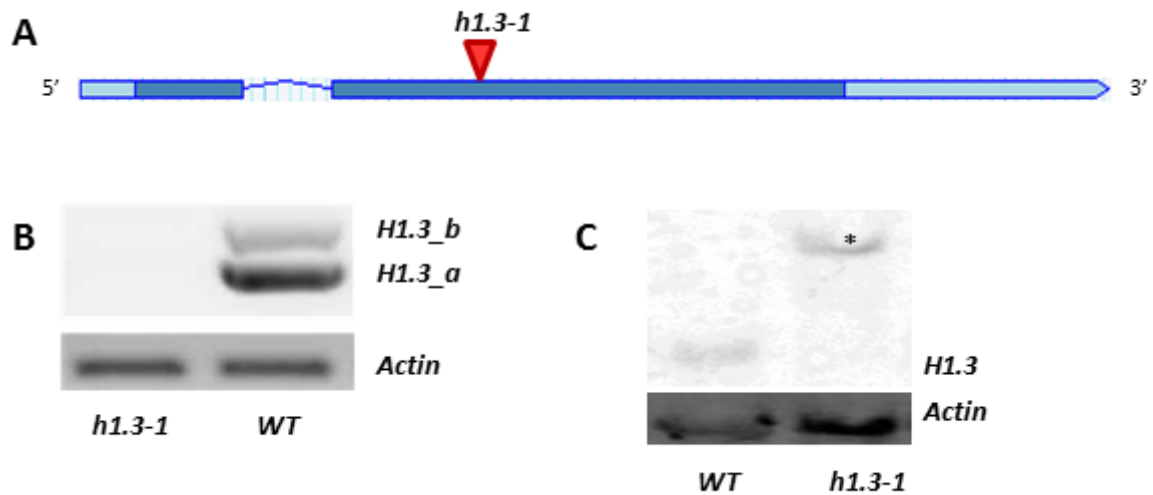

**Figure S4. Characterization of the *h1.3* mutant line.**

(A) Schematic diagram of the *H1.3* gene showing exons (blue bars), introns (narrow line), UTRs (light blue bars) and the transposon insertion site in the *h1.3* mutant. The *H1.3* scheme was downloaded from the ABRC and modified. (B) RT-PCR analysis of *h1.3* lines. *H1.3\_b* is a spliced form that retains an intron. At the beginning of this intron is a stop codon, so that if any protein was translated from the *H1.3\_b* transcript it would only consist of part of the N-terminal domain, which is thought to have no function. Actin was used as a reference transcript. (C) Northern blot confirming the absence of an appropriate *H1.3* transcript in *h1.3-1*. This analysis revealed the presence of a high molecular mass band in *h1.3-1* (asterisk on panel C), which probably represents an erroneous *H1.3* transcript including part of the 6-kb transposon insertion.

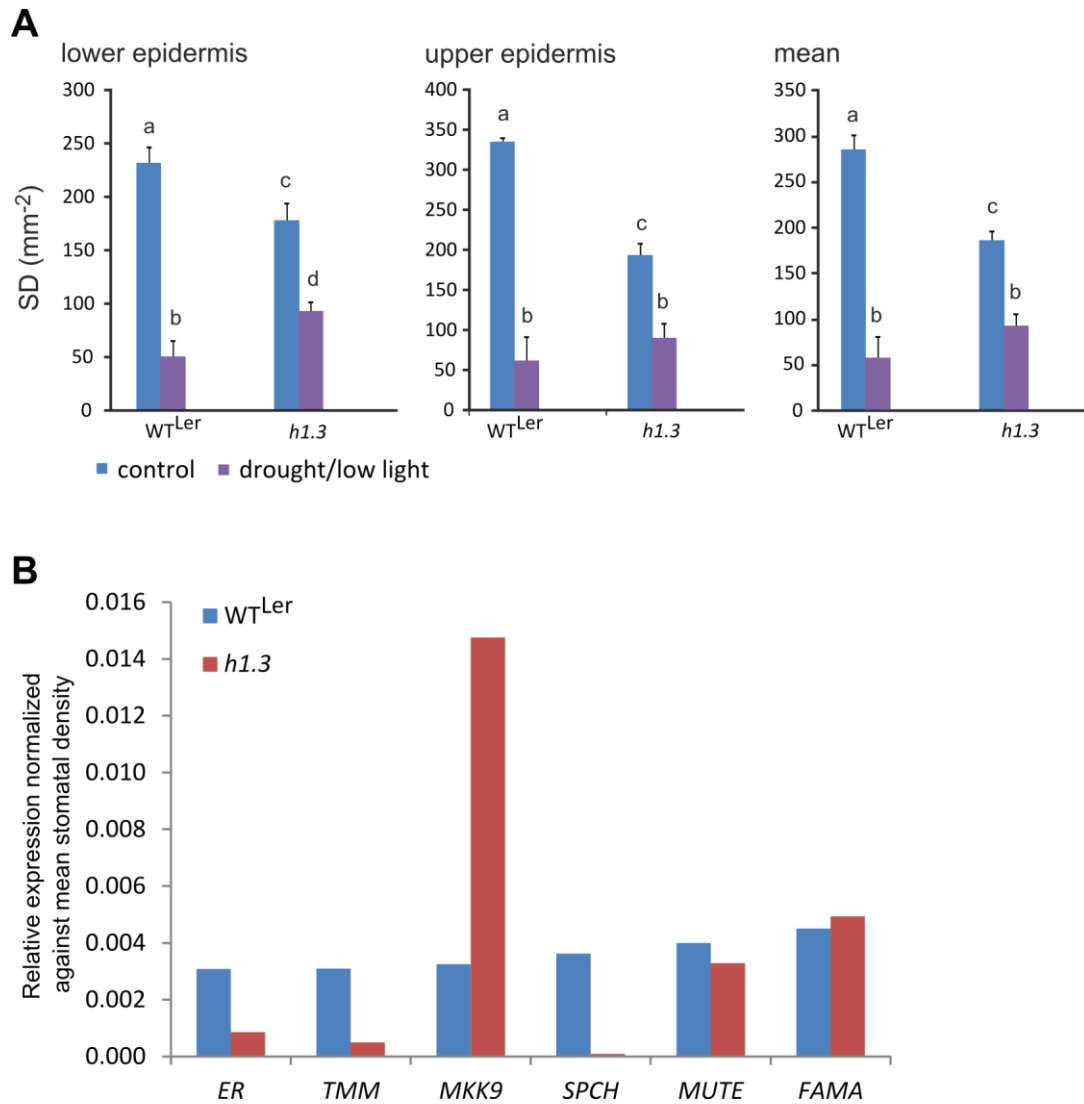

**Figure S5. (A)** Stomatal density (SD) in leaves of wild-type (WT<sup>Ler</sup>) and *h1.3* mutant plants grown in control and drought/low light conditions. Stomatal density was measured for both the lower and upper epidermis. Statistically significant differences are indicated by letters ( $p < 0.05$ , Tukey's HSD test). Error bars represent standard deviations. **(B)** Relative expression (RT-qPCR) of genes with key functions in guard cell biogenesis in *h1.3* mutant and wild-type plants (the mean expression value from the same data which are presented in Fig. 2C) normalized against mean stomatal density.

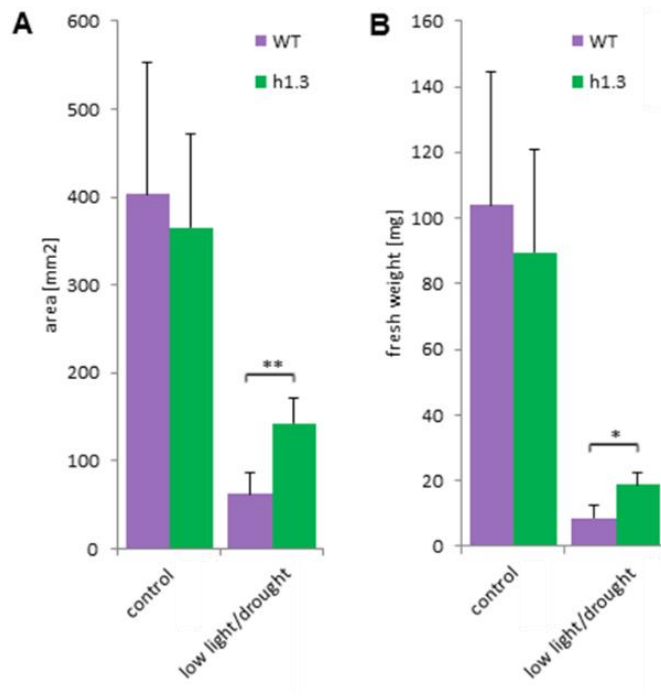

**Figure S6. Growth of *h1.3* mutant plants is not restricted in response to low light/drought treatment, unlike that of wild-type plants.** Color bars indicate the average area (A) and fresh weight (B) for two-week-old WT<sup>Ler</sup> (purple) and *h1.3* (green) plants grown under control conditions or a combination of low light and drought. \* – p-value < 0.05, \*\* – p-value ≤ 0.01 (T-test). The plotted values are the means ± SD.

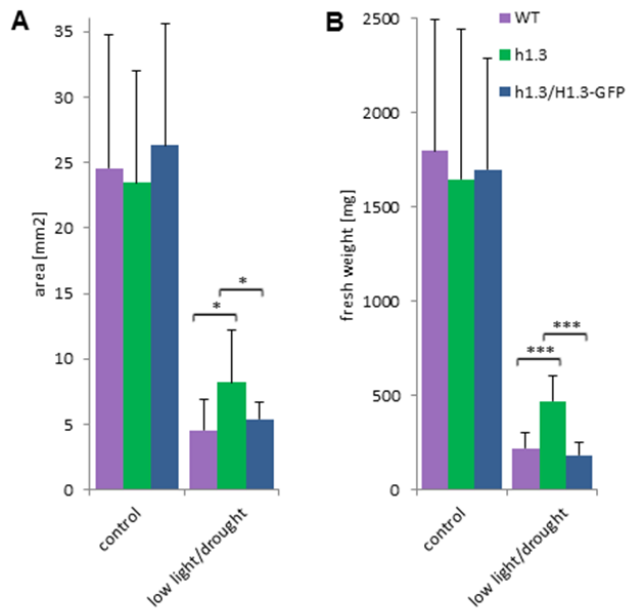

**Figure S7. The *h1.3* mutant complemented with H1.3-GFP responds to combined low light/drought treatment similarly to wild-type plants.**

Color bars indicate the average area (A) and fresh weight (B) for 5-week-old WT<sup>Ler</sup> (purple), *h1.3* (green) and complemented *h1.3/H1.3-GFP* (dark blue) plants grown under control conditions or for 17 days with a combination of low light and drought (\* – p-value <0.05, \*\*\*– p-value <0.005, T-test). The plotted values are the means ± SD.

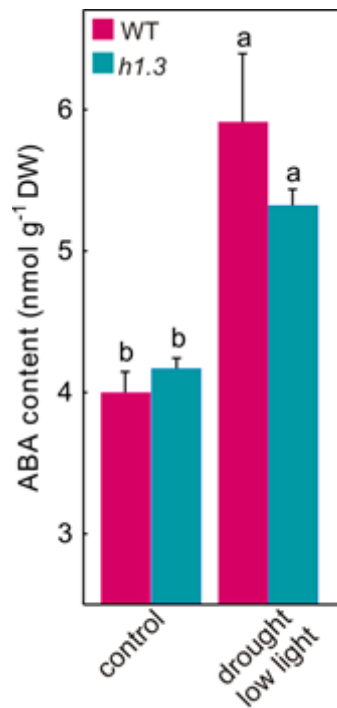

**Figure S8. ABA content in wild-type (WT<sup>Ler</sup>) and *h1.3* plants in control and combined low light/drought conditions.** Statistically significant differences are indicated by letters ( $p < 0.05$ , Tukey's HSD test).



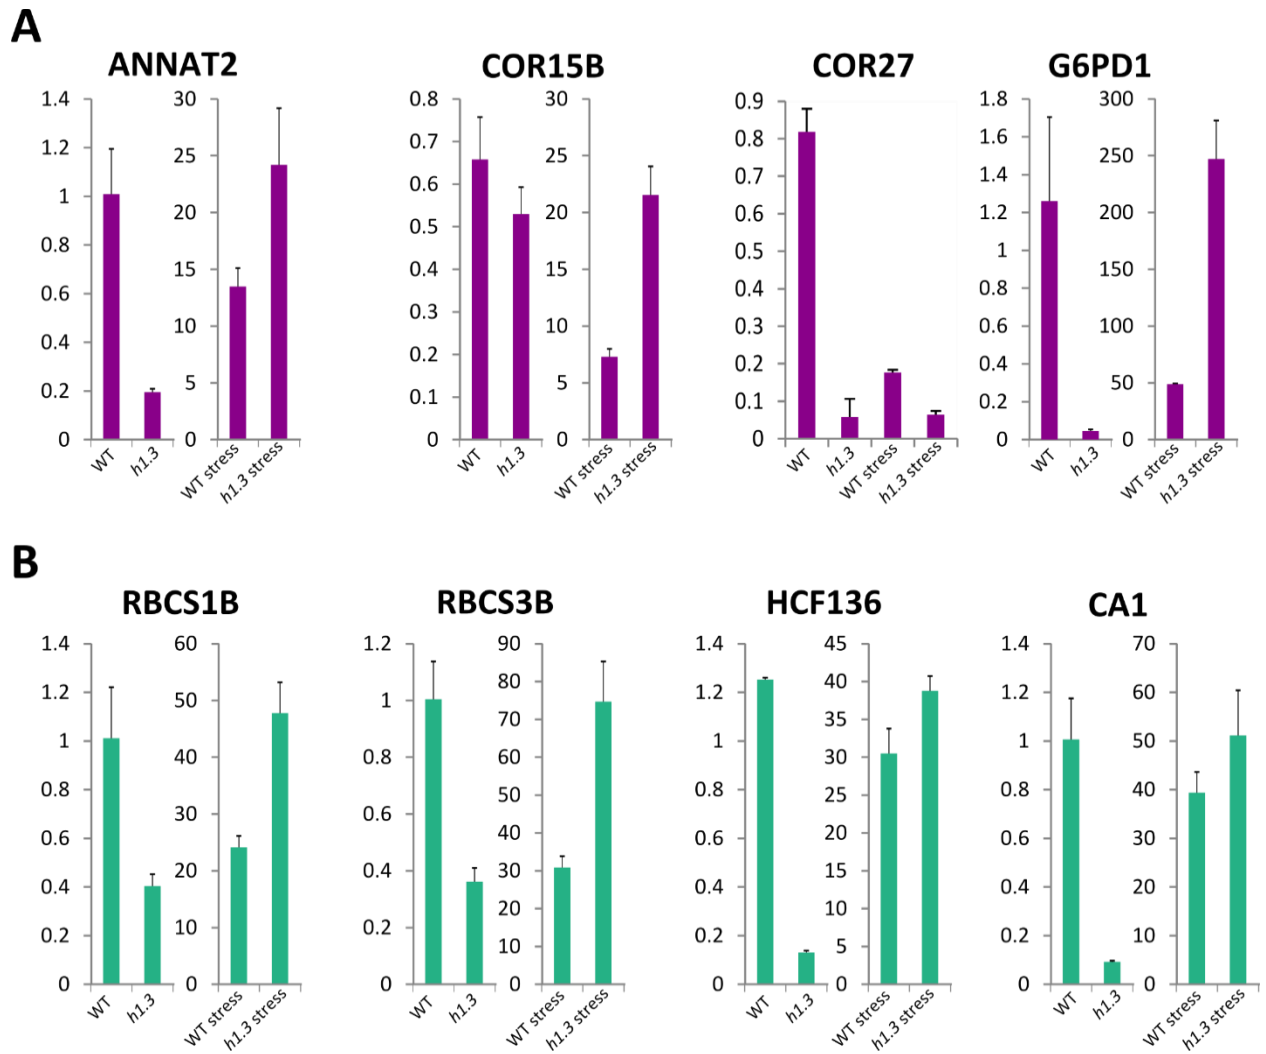

**Figure S9. Verification by RT-qPCR of gene expression data obtained in microarray experiments examining the effects of combined low light/drought treatment (stress).**

(A) Relative expression of genes involved in responses to environmental stimuli. (B) Relative expression of genes involved in responses of the photosynthetic apparatus. Error bars represent standard deviations from three replicates consisting of leaves from four plants grown in soil.

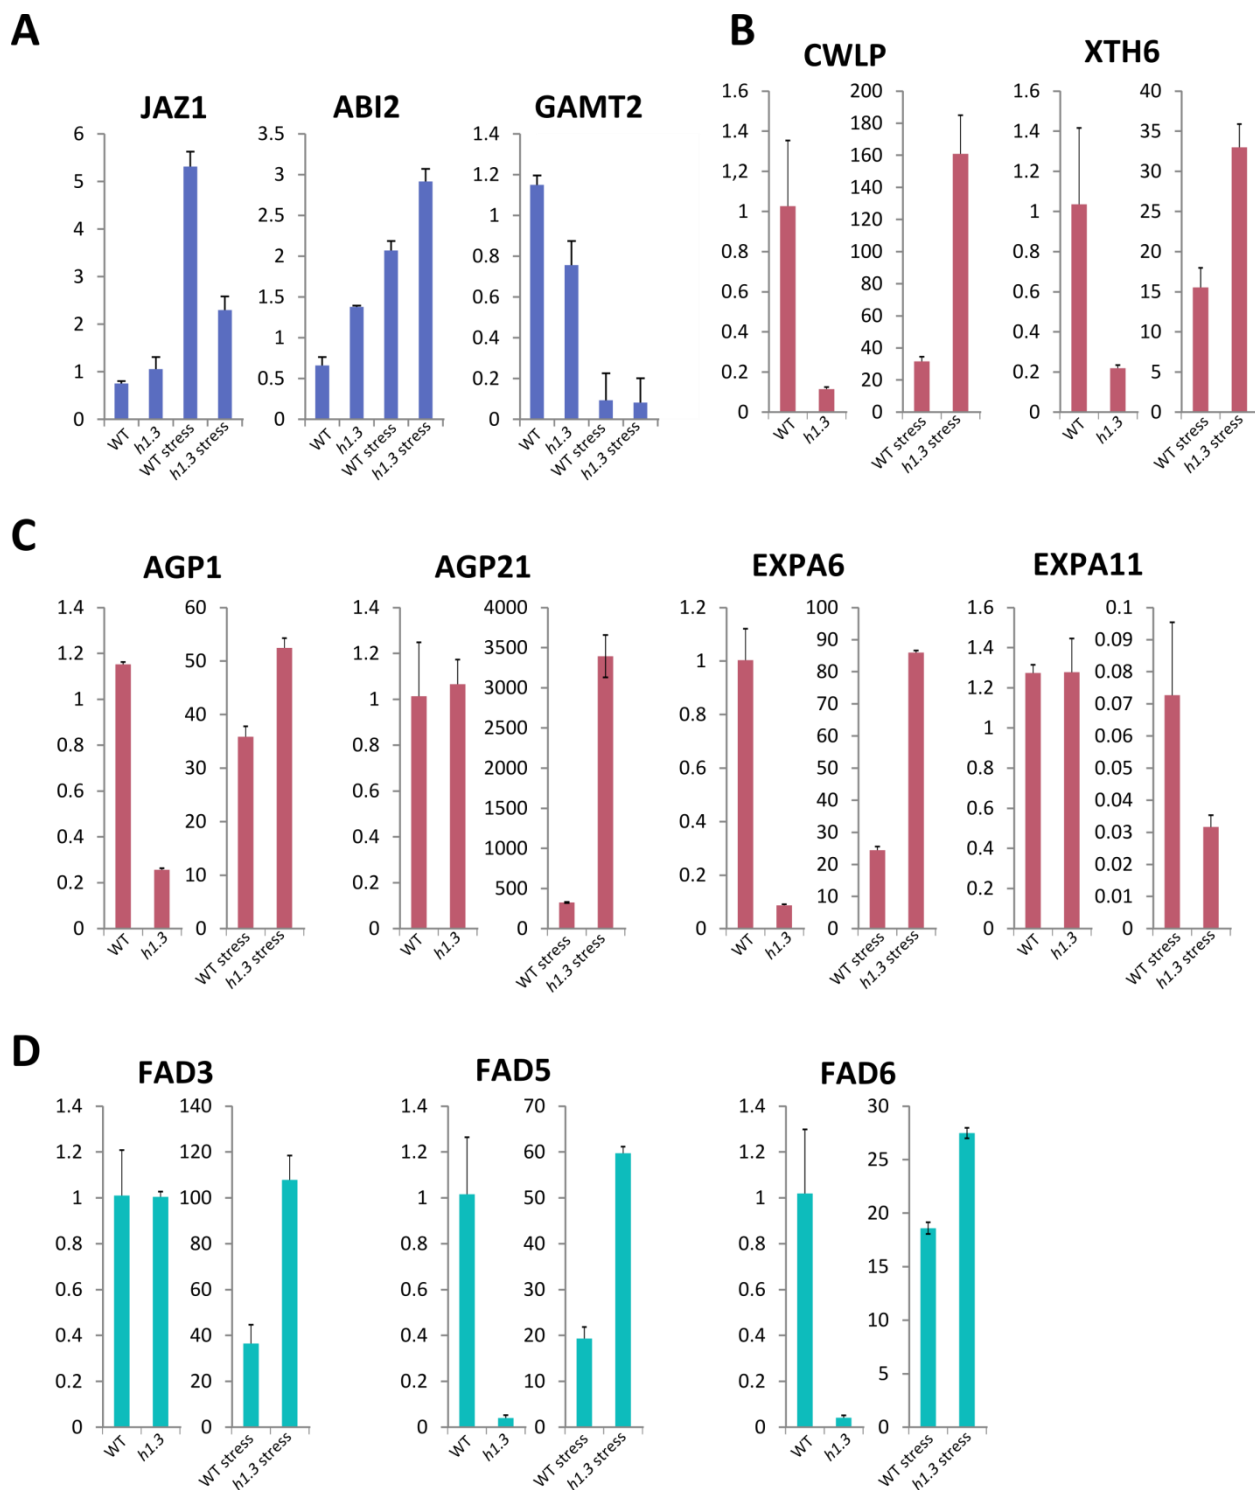

**Figure S10. Verification by RT-qPCR of gene expression data obtained in microarray experiments examining the effects of combined low light/drought treatment (stress).**

**(A)** Relative expression of genes involved in hormone regulation. **(B, C)** Relative expression of genes involved in cell wall biogenesis and regulation. **(D)** Relative expression of genes involved in fatty acid metabolism. Error bars represent standard deviations from three replicates consisting of leaves from four plants grown in soil.

**A**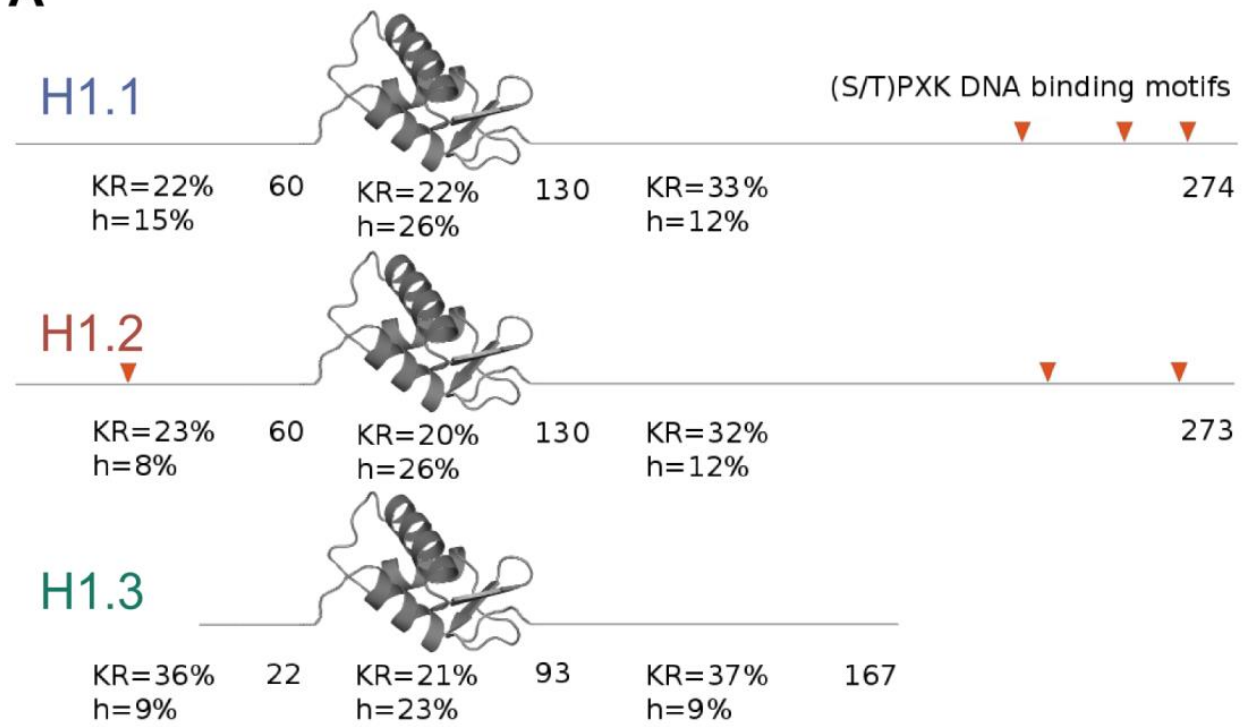**B**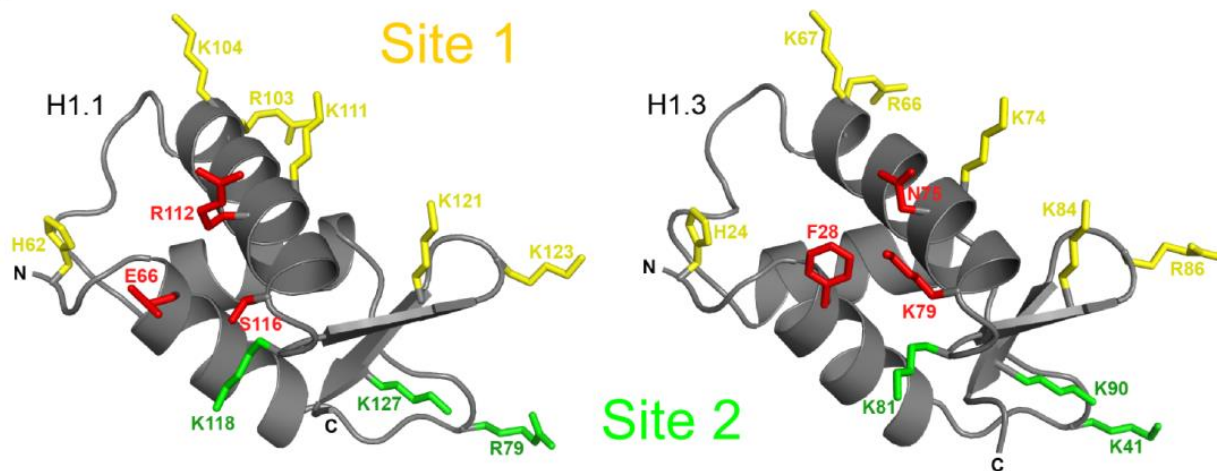**C**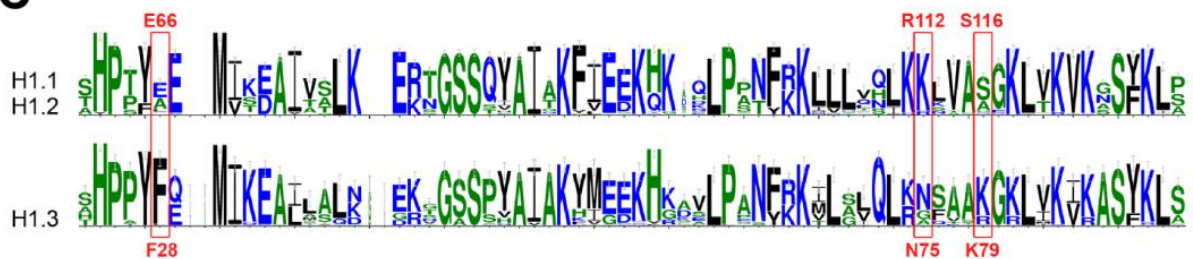

**Figure S11. Arabidopsis linker histones belong to two structurally and functionally diversified families.**

(A) Protein sequence features of *Arabidopsis thaliana* H1 variants. The percentages of positively charged (KR) and hydrophobic (h) residues are shown for the N-terminal tail, the central GH1 domain and the C-terminal region, respectively. Red triangles indicate (S/T)PXX motifs. (B) 3D models of the GH1 domain of H1.1 (left) and H1.3 (right). (C) Amino acid sequence conservation in the plant H1.1/2-like and H1.3-like families among flowering plant species. In the models, residues corresponding to DNA binding sites (Brown et al., 2006) are colored yellow (Site 1) and green (Site 2), while those representing the most prominent differences between plant H1.1/2-like and H1.3-like variants are shown in red.



**Figure S12. Phylogenetic tree of 196 plant H1 proteins with HMG sequences used as an outgroup.**

The phylogenetic analysis was performed with PhyML. Approximate likelihood ratio test SH-like branch supports of above 50% are shown. The tree images were prepared with iTol. Phylogenetic trees inferred using different sequence datasets, outgroups and parameter settings produce variable topologies with regard to the old *Viridiplantae* clades. The long branches belonging to moss and algae can be positioned either within angiosperm clades or at the base of the tree. This uncertain positioning is possibly due to a combination of two factors: the limited number of phylogenetically informative sites and the phenomenon of long-branch attraction. The H1.1 and H1.3 clades are reproducible. Recurrent Whole Genome Duplications and polyploidization events have been vital to plant genome evolution. Multiple duplications and gene losses shaped the evolutionary history of the H1 protein family; in consequence there are multiple in- and out-paralogs, e.g. in *Zea mays* and *Pisum sativum*, which are visible as species-specific or order-specific sequence clusters.

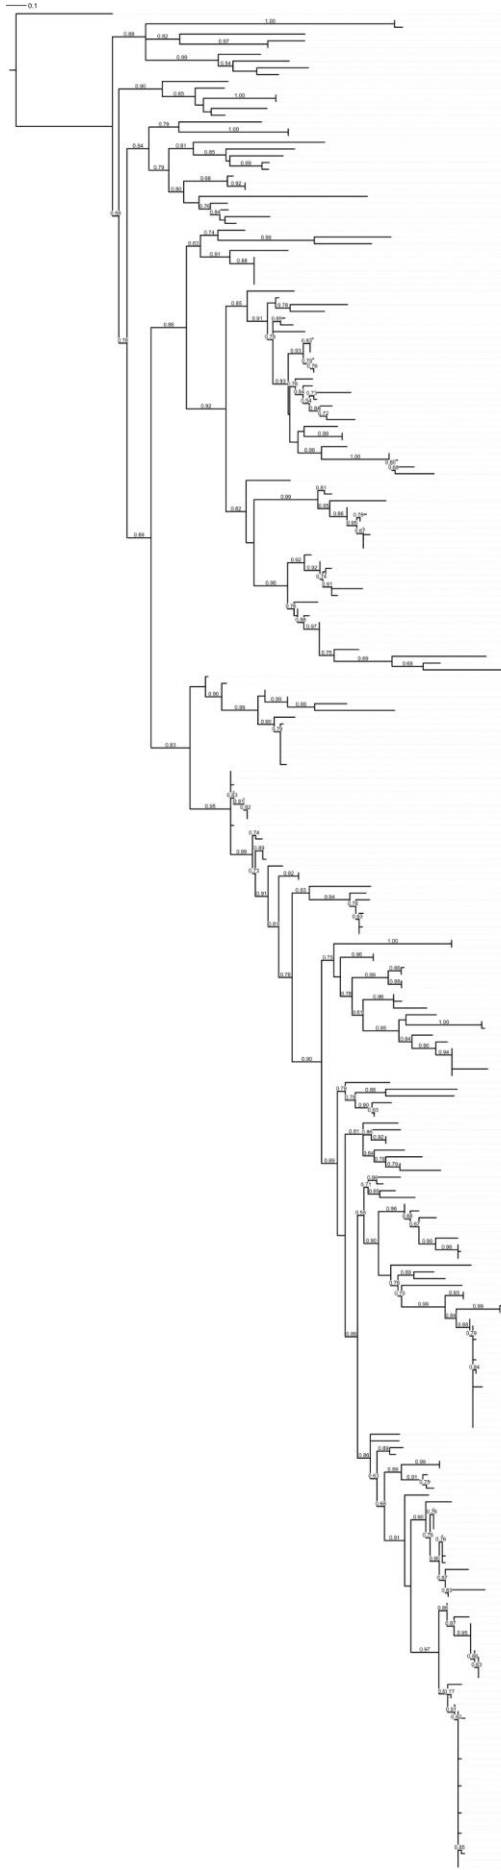

Di. diocleumAX4 GI=6080007  
 Sel. moenchii GI=3277400  
 Ch. varians GI=5511002  
 M. sp. RUC299 GI=2407037  
 Cl. nehrhardi GI=15947068  
 Cl. nehrhardi GI=1847614  
 V. zerkowii GI=30282222  
 Q. mix GI=3512773  
 V. vifera GI=1476787  
 V. vifera GI=2074284  
 P. inchoana GI=2240848  
 Th. sacca GI=2103023  
 A. thalassia GI=2480984  
 Sel. moenchii GI=3277400  
 Sel. moenchii GI=3277400  
 Sel. moenchii GI=32772314  
 P. taeda GI=50186623  
 Cr. japonica GI=9073479  
 P. sibirica GI=1017941  
 P. sibirica GI=2448889  
 P. sibirica GI=29481848  
 P. sibirica GI=29448138  
 P. sibirica GI=19007790  
 P. sibirica GI=19007791  
 P. sibirica GI=19007792  
 P. sibirica GI=19007793  
 P. sibirica GI=19007794  
 P. sibirica GI=19007795  
 P. sibirica GI=19007796  
 P. sibirica GI=19007797  
 P. sibirica GI=19007798  
 P. sibirica GI=19007799  
 P. sibirica GI=19007800  
 P. sibirica GI=19007801  
 P. sibirica GI=19007802  
 P. sibirica GI=19007803  
 P. sibirica GI=19007804  
 P. sibirica GI=19007805  
 P. sibirica GI=19007806  
 P. sibirica GI=19007807  
 P. sibirica GI=19007808  
 P. sibirica GI=19007809  
 P. sibirica GI=19007810  
 P. sibirica GI=19007811  
 P. sibirica GI=19007812  
 P. sibirica GI=19007813  
 P. sibirica GI=19007814  
 P. sibirica GI=19007815  
 P. sibirica GI=19007816  
 P. sibirica GI=19007817  
 P. sibirica GI=19007818  
 P. sibirica GI=19007819  
 P. sibirica GI=19007820  
 P. sibirica GI=19007821  
 P. sibirica GI=19007822  
 P. sibirica GI=19007823  
 P. sibirica GI=19007824  
 P. sibirica GI=19007825  
 P. sibirica GI=19007826  
 P. sibirica GI=19007827  
 P. sibirica GI=19007828  
 P. sibirica GI=19007829  
 P. sibirica GI=19007830  
 P. sibirica GI=19007831  
 P. sibirica GI=19007832  
 P. sibirica GI=19007833  
 P. sibirica GI=19007834  
 P. sibirica GI=19007835  
 P. sibirica GI=19007836  
 P. sibirica GI=19007837  
 P. sibirica GI=19007838  
 P. sibirica GI=19007839  
 P. sibirica GI=19007840  
 P. sibirica GI=19007841  
 P. sibirica GI=19007842  
 P. sibirica GI=19007843  
 P. sibirica GI=19007844  
 P. sibirica GI=19007845  
 P. sibirica GI=19007846  
 P. sibirica GI=19007847  
 P. sibirica GI=19007848  
 P. sibirica GI=19007849  
 P. sibirica GI=19007850  
 P. sibirica GI=19007851  
 P. sibirica GI=19007852  
 P. sibirica GI=19007853  
 P. sibirica GI=19007854  
 P. sibirica GI=19007855  
 P. sibirica GI=19007856  
 P. sibirica GI=19007857  
 P. sibirica GI=19007858  
 P. sibirica GI=19007859  
 P. sibirica GI=19007860  
 P. sibirica GI=19007861  
 P. sibirica GI=19007862  
 P. sibirica GI=19007863  
 P. sibirica GI=19007864  
 P. sibirica GI=19007865  
 P. sibirica GI=19007866  
 P. sibirica GI=19007867  
 P. sibirica GI=19007868  
 P. sibirica GI=19007869  
 P. sibirica GI=19007870  
 P. sibirica GI=19007871  
 P. sibirica GI=19007872  
 P. sibirica GI=19007873  
 P. sibirica GI=19007874  
 P. sibirica GI=19007875  
 P. sibirica GI=19007876  
 P. sibirica GI=19007877  
 P. sibirica GI=19007878  
 P. sibirica GI=19007879  
 P. sibirica GI=19007880  
 P. sibirica GI=19007881  
 P. sibirica GI=19007882  
 P. sibirica GI=19007883  
 P. sibirica GI=19007884  
 P. sibirica GI=19007885  
 P. sibirica GI=19007886  
 P. sibirica GI=19007887  
 P. sibirica GI=19007888  
 P. sibirica GI=19007889  
 P. sibirica GI=19007890  
 P. sibirica GI=19007891  
 P. sibirica GI=19007892  
 P. sibirica GI=19007893  
 P. sibirica GI=19007894  
 P. sibirica GI=19007895  
 P. sibirica GI=19007896  
 P. sibirica GI=19007897  
 P. sibirica GI=19007898  
 P. sibirica GI=19007899  
 P. sibirica GI=19007900  
 P. sibirica GI=19007901  
 P. sibirica GI=19007902  
 P. sibirica GI=19007903  
 P. sibirica GI=19007904  
 P. sibirica GI=19007905  
 P. sibirica GI=19007906  
 P. sibirica GI=19007907  
 P. sibirica GI=19007908  
 P. sibirica GI=19007909  
 P. sibirica GI=19007910  
 P. sibirica GI=19007911  
 P. sibirica GI=19007912  
 P. sibirica GI=19007913  
 P. sibirica GI=19007914  
 P. sibirica GI=19007915  
 P. sibirica GI=19007916  
 P. sibirica GI=19007917  
 P. sibirica GI=19007918  
 P. sibirica GI=19007919  
 P. sibirica GI=19007920  
 P. sibirica GI=19007921  
 P. sibirica GI=19007922  
 P. sibirica GI=19007923  
 P. sibirica GI=19007924  
 P. sibirica GI=19007925  
 P. sibirica GI=19007926  
 P. sibirica GI=19007927  
 P. sibirica GI=19007928  
 P. sibirica GI=19007929  
 P. sibirica GI=19007930  
 P. sibirica GI=19007931  
 P. sibirica GI=19007932  
 P. sibirica GI=19007933  
 P. sibirica GI=19007934  
 P. sibirica GI=19007935  
 P. sibirica GI=19007936  
 P. sibirica GI=19007937  
 P. sibirica GI=19007938  
 P. sibirica GI=19007939  
 P. sibirica GI=19007940  
 P. sibirica GI=19007941  
 P. sibirica GI=19007942  
 P. sibirica GI=19007943  
 P. sibirica GI=19007944  
 P. sibirica GI=19007945  
 P. sibirica GI=19007946  
 P. sibirica GI=19007947  
 P. sibirica GI=19007948  
 P. sibirica GI=19007949  
 P. sibirica GI=19007950  
 P. sibirica GI=19007951  
 P. sibirica GI=19007952  
 P. sibirica GI=19007953  
 P. sibirica GI=19007954  
 P. sibirica GI=19007955  
 P. sibirica GI=19007956  
 P. sibirica GI=19007957  
 P. sibirica GI=19007958  
 P. sibirica GI=19007959  
 P. sibirica GI=19007960  
 P. sibirica GI=19007961  
 P. sibirica GI=19007962  
 P. sibirica GI=19007963  
 P. sibirica GI=19007964  
 P. sibirica GI=19007965  
 P. sibirica GI=19007966  
 P. sibirica GI=19007967  
 P. sibirica GI=19007968  
 P. sibirica GI=19007969  
 P. sibirica GI=19007970  
 P. sibirica GI=19007971  
 P. sibirica GI=19007972  
 P. sibirica GI=19007973  
 P. sibirica GI=19007974  
 P. sibirica GI=19007975  
 P. sibirica GI=19007976  
 P. sibirica GI=19007977  
 P. sibirica GI=19007978  
 P. sibirica GI=19007979  
 P. sibirica GI=19007980  
 P. sibirica GI=19007981  
 P. sibirica GI=19007982  
 P. sibirica GI=19007983  
 P. sibirica GI=19007984  
 P. sibirica GI=19007985  
 P. sibirica GI=19007986  
 P. sibirica GI=19007987  
 P. sibirica GI=19007988  
 P. sibirica GI=19007989  
 P. sibirica GI=19007990  
 P. sibirica GI=19007991  
 P. sibirica GI=19007992  
 P. sibirica GI=19007993  
 P. sibirica GI=19007994  
 P. sibirica GI=19007995  
 P. sibirica GI=19007996  
 P. sibirica GI=19007997  
 P. sibirica GI=19007998  
 P. sibirica GI=19007999  
 P. sibirica GI=19008000

Amoebozoa  
 Chlorophyta  
 Lycopodiophyta  
 Magnoliophyta  
 Magnoliophyta  
 Bryophyta  
 Lycopodiophyta  
 Pinophyta  
 Pinophyta  
 Chlorophyta  
 Magnoliophyta  
 H1.3  
 Magnoliophyta  
 H1.1-2

**Figure S13. Phylogenetic tree of 274 plant H1 proteins with *Dictyostelium discoideum* H1 protein as an outgroup.** See the detailed description under [Figure S12](#).



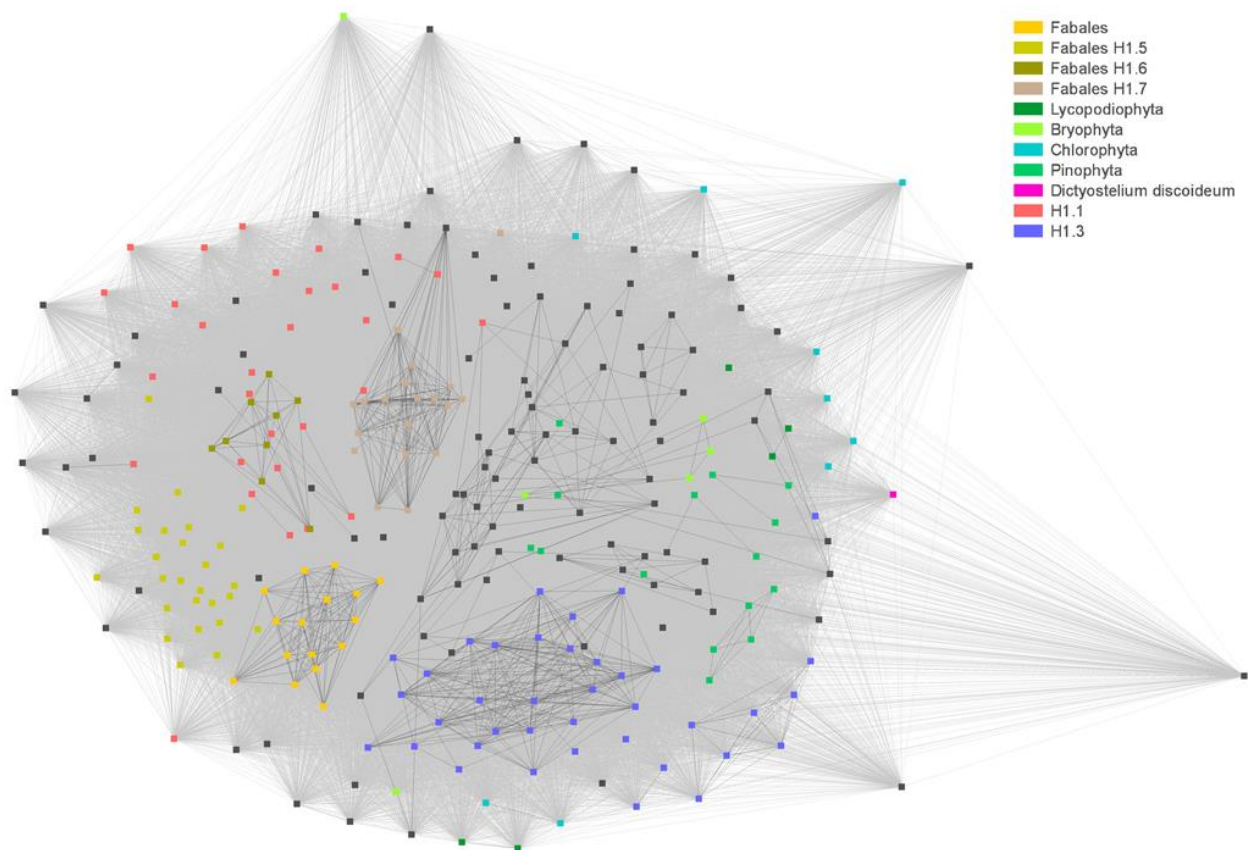

**Figure S14. CLANS clustering of 274 plant H1 proteins and a 2D image of the clustering results for an interactive graphical representation of *Viridiplantae* H1 sequences.**

To elucidate the relationships between and within a group of sequences we used CLANS, a graphical clustering tool implemented in Java, which visualizes pairwise sequence similarities. Sequences in the graph are represented as vertices and all-against-all BLAST high-scoring segment pairs (HSPs) as edges. The H1.1 representatives form species-specific clusters, e.g. for Fabales. H1.3 sequences are mostly grouped in one part of the diagram. Algae, fern, moss and gymnosperm sequences neither form a specific cluster nor enter one of the aforementioned groups. These general observations are consistent with the phylogenetic analyses. It should be emphasized that clustering is alignment independent and can be applied to large data sets. The H1 proteins are extremely ancient and their sequences are fairly well conserved between distantly related taxa. For example, the *Chlorella* H1 sequence has a similar level of amino acid sequence identity (60%) to both angiosperms and *Micromonas*. In addition, the GH1 domain of the slime mold *Dictyostelium* displays 50% sequence identity to that of plants. The GH1 protein domain is only about 70 amino-acids long and the evolutionary distance between the aforementioned lineages is far greater than that between

major plant groups that evolved after land colonization. Given this high level of sequence conservation over a very long evolutionary time, one might hypothesize that since functional GH1 protein domains have had to retain almost half of their residues, in consequence their sequence similarity cannot fall below a certain level. The observed similarity might be the result of substitution saturation within the limited functional space.

For a more reliable classification and in order to study the taxonomic distribution of both H1 variants, we performed detailed phylogenetic analyses. Clades grouping sequences of the main (H1.1/2-like) and stress-inducible (H1.3-like) variants from all mono- and dicotyledonous plants (for which the relevant information is available) are clearly separated. Phylogenetic inference demonstrated that H1-type globular domains from moss, fern or gymnosperms cannot be precisely classified into main and stress-inducible variants. Their basal positioning on the phylogenetic tree suggests that divergence of the two clades of angiosperm H1s was a later evolutionary event, probably associated with the divergence of angiosperms. *Amborella trichopoda*, a member of the Amborellales, the earliest angiosperm branch (Magnoliophyta), already has both H1.1/2-like (gi|548841348) and H1.3-like (gi|548856617) GH1 variants that also display the characteristic differences in CTD length.

A temporary score file is presented, with the run file available online:

<http://bioputer.mimuw.edu.pl/data/H1/CLANS>

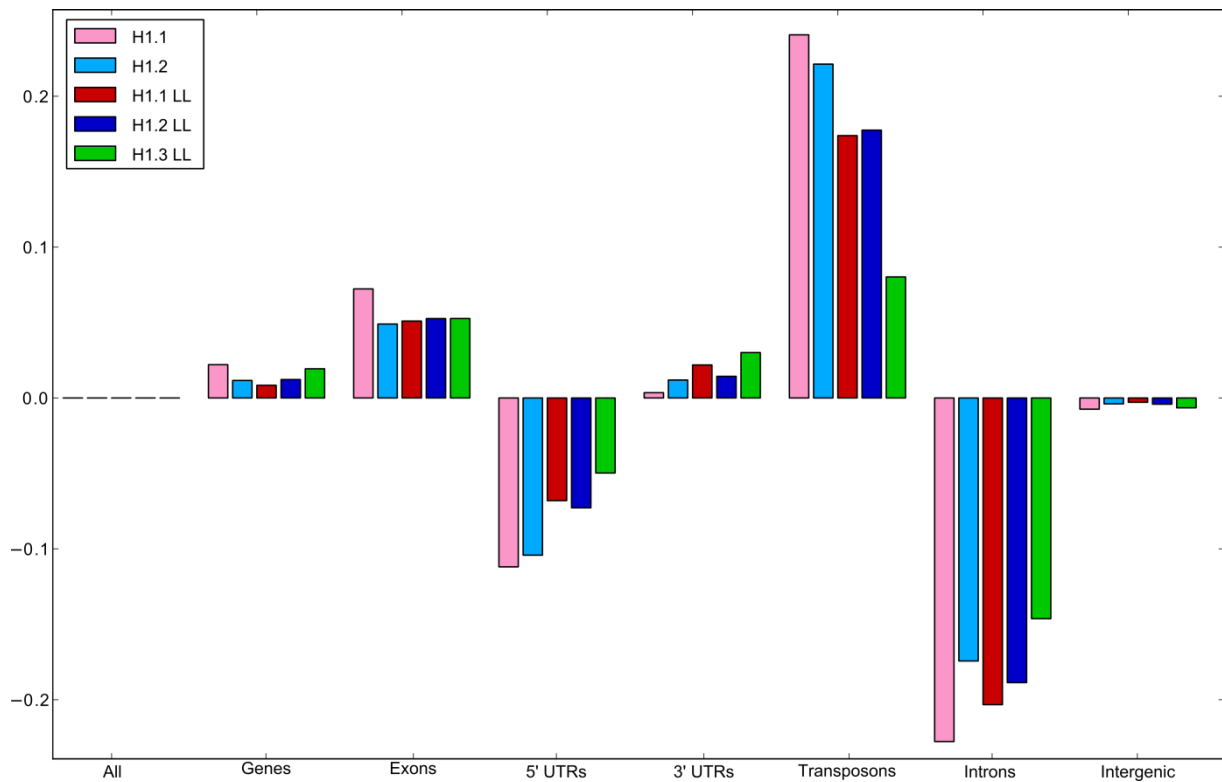

**Figure S15. Genomic profiles for H1 variants in plants grown in control and 4-day low light (LL) conditions.** H1 variants are depleted on 5'UTRs and introns, and overrepresented on transposons. The length of the colored bars represents the level of enrichment or depletion of the H1 variant compared with the total genome signal (All). There are no statistically significant differences for the H1.1 and H1.2 variants. The complete statistics are presented in [Table S3](#).

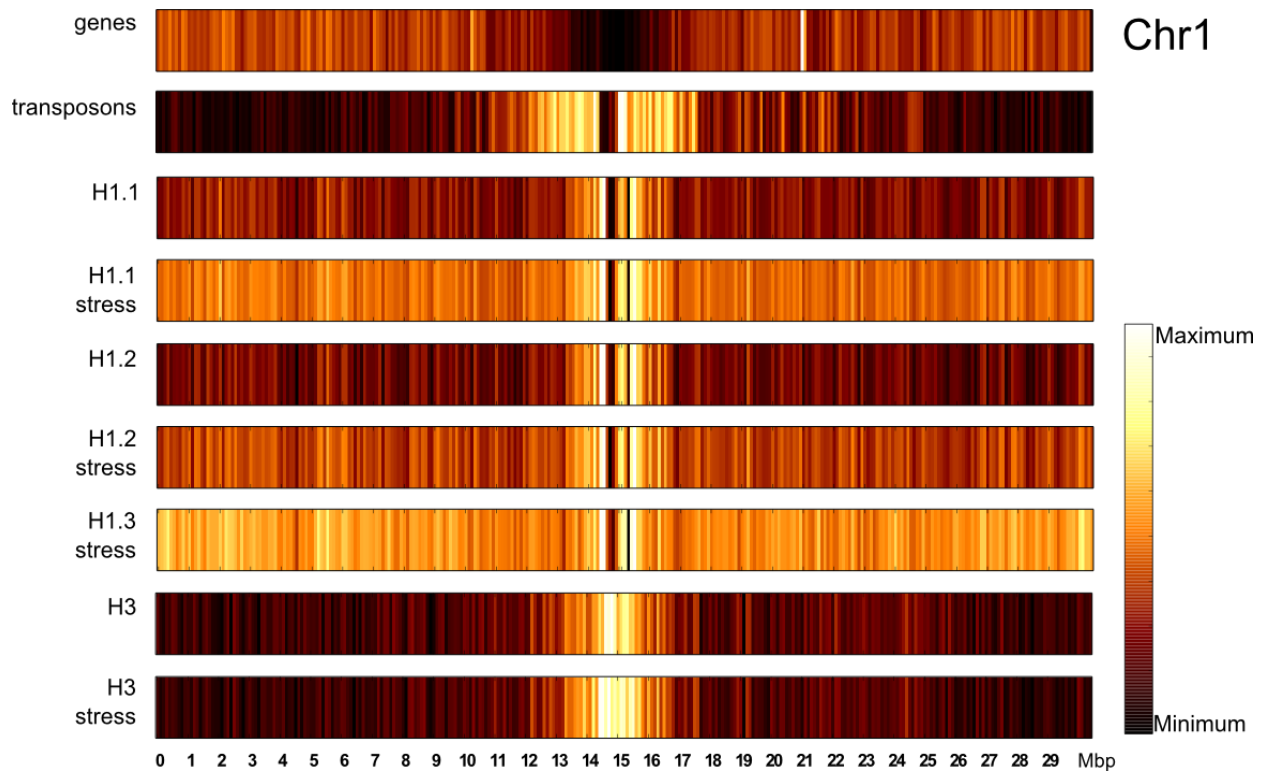

**Figure S16. Distribution of H1 variants along Arabidopsis chromosome 1 in control and low light conditions.** The heatmaps show the distribution of the H1 signal ( $\ln(\text{IP}/\text{Input})$ ) along the whole chromosome (averaged for each 100 kb). Regions with lighter colors indicate a stronger signal compared to darker regions within one heatmap bar. For comparison, the distribution of genes and transposons is shown at the top. The unit of measurement on the bottom scale is 1 Mbp. It is important to note that since ChIP-on-chip data do not allow quantitative estimation of absolute protein amounts, only qualitative distribution profiles can be compared between variants. The heatmap scale can however be used to analyze quantitative differences in occupancy for a certain variant in particular conditions.

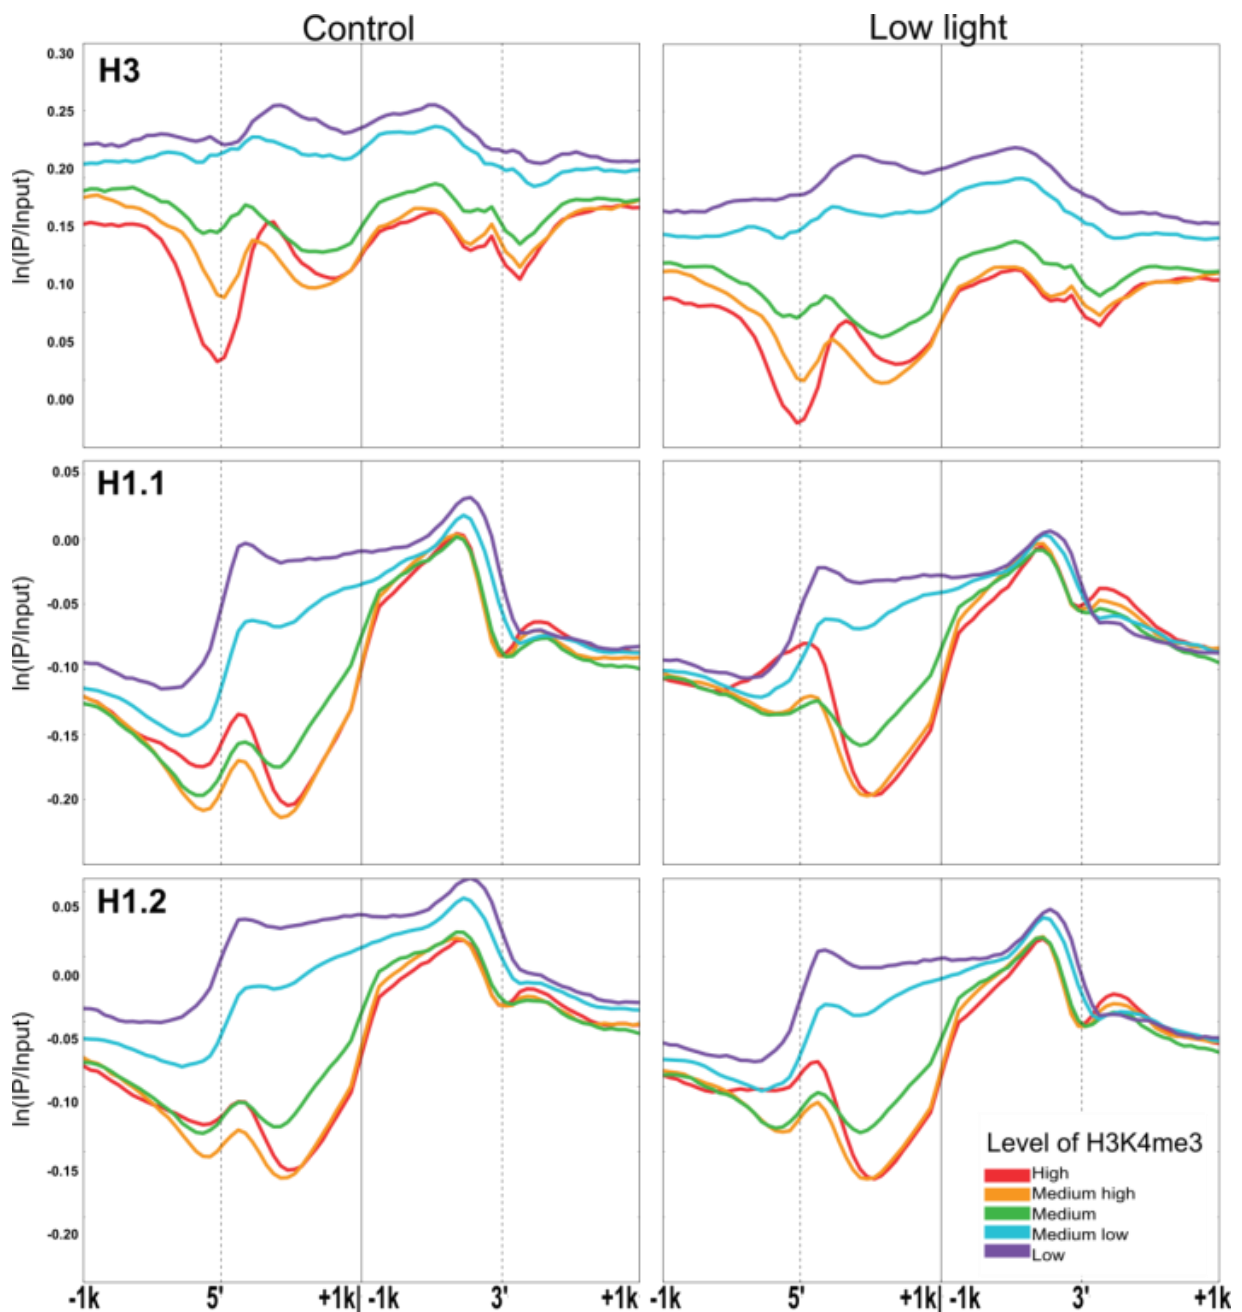

**Figure S17. Distribution of the main H1s and H3 within genes with different levels of H3K4me3 of plants grown in control and 4-day low light conditions.** Genes are divided into five groups according to the level of the H3K4me3 mark (Luo et al., 2012). The signals for occupancy by H1s and H3 are plotted for 1 kb around both the 5' (TSS) and 3' (TTS) ends for the five classes of genes. Each group consists of at least 4495 genes.

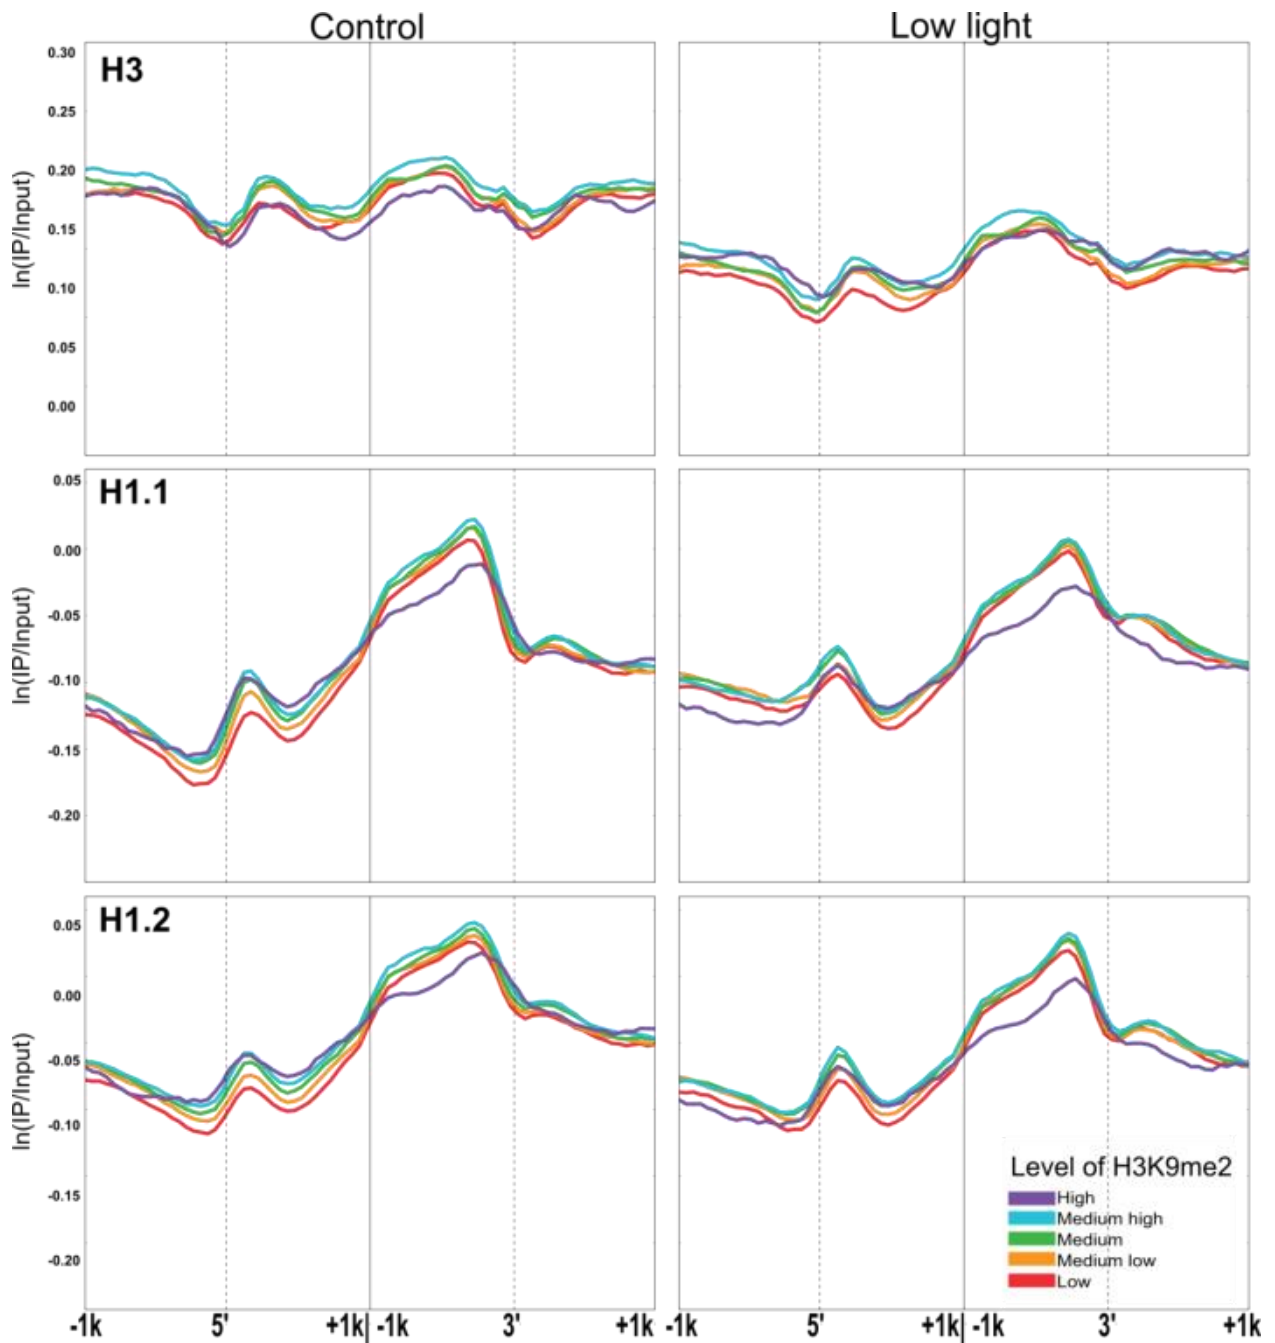

**Figure S18. Distribution of the main H1s and H3 within genes with different levels of H3K9me2 of plants grown in control and 4-day low light conditions.** Genes are divided into five groups according to the level of the H3K9me2 mark (Moissiard et al., 2012). The signals for occupancy by H1s and H3 are plotted for 1 kb around both 5' (TSS) and 3' (TTS) ends for the five classes of genes. Each group consists of at least 4495 genes.

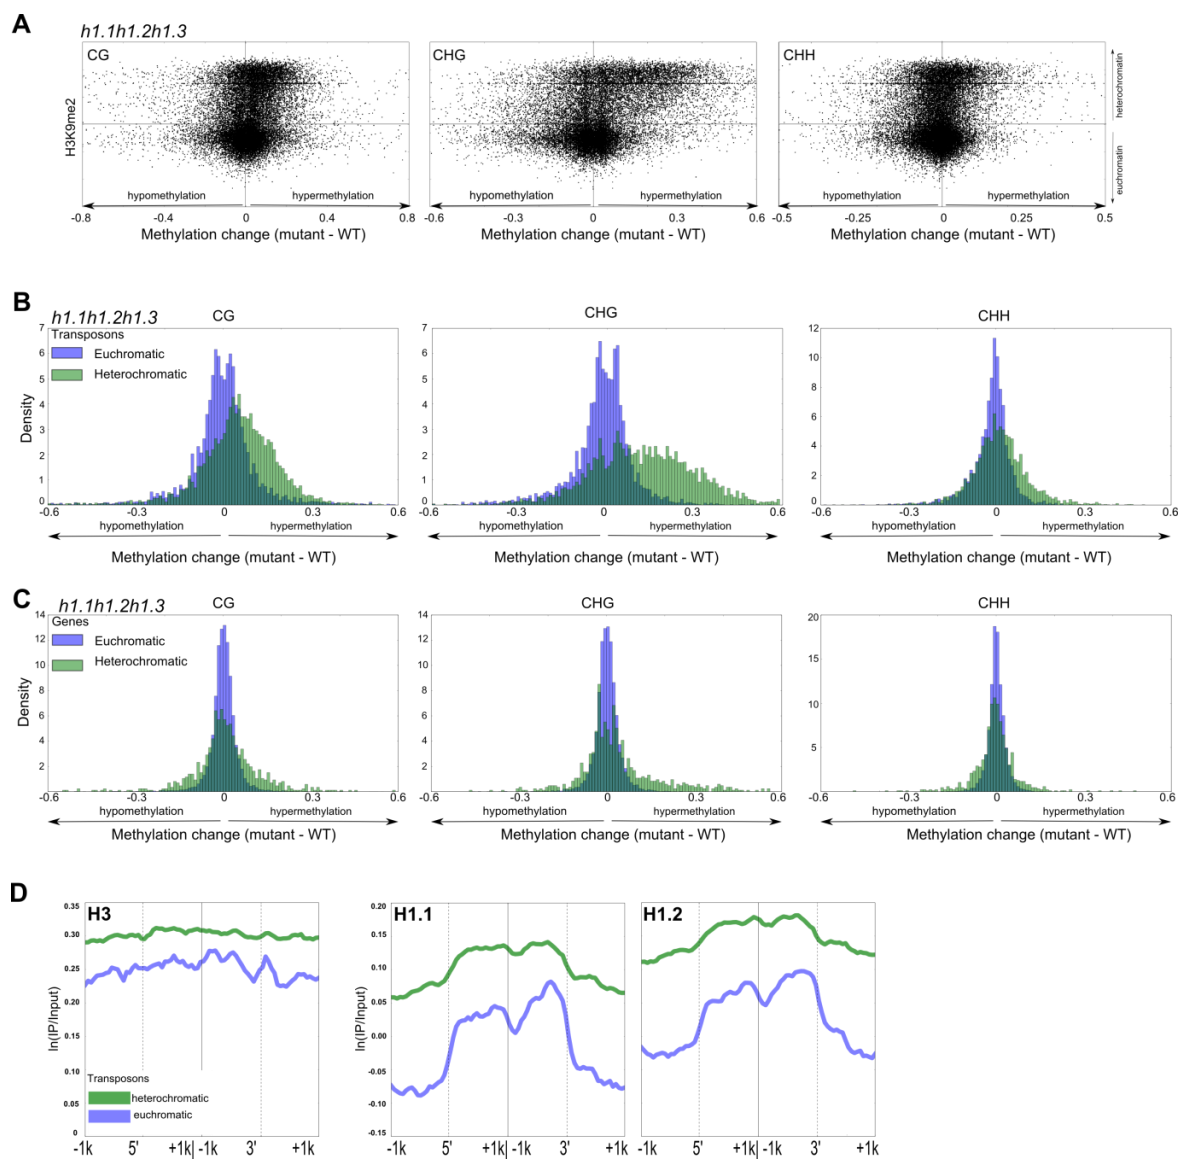

**Figure S19. Methylation levels in the triple *h1.1h1.2h1.3* mutant.** (A) Density plots of differences in the methylation of transposable elements (TEs) in *h1.1h1.2h1.3* and wild-type ( $WT^{Col-0}$ ) plants. Positive numbers indicate higher methylation levels in the triple *h1* mutant. The higher the level of H3K9me2, the more heterochromatic the location of the TE. (B) Kernel density plots of methylation differences between *h1.1h1.2h1.3* and wild-type plants for euchromatic and heterochromatic transposons. For euchromatic transposons, the quintal with the lowest H3K9me2 and for heterochromatic transposons, the quintal with the highest H3K9me2, were selected from all transposons. (C) Kernel density plots of methylation differences between *h1.1h1.2h1.3* and wild-type plants on euchromatic and heterochromatic genes. Euchromatic genes were selected as those with a low level of H3K9me2, and heterochromatic genes as those with a high level of H3K9me2. (D) Distribution of the main H1 variants and H3 in control conditions across transposons divided between heterochromatin and euchromatin. The average distribution of H1s around the 3' and 5' ends ( $\pm 1$ kb) of TEs is plotted. TEs are divided into euchromatic TEs and heterochromatic TEs, according to their level of H3K9me2 occupancy.



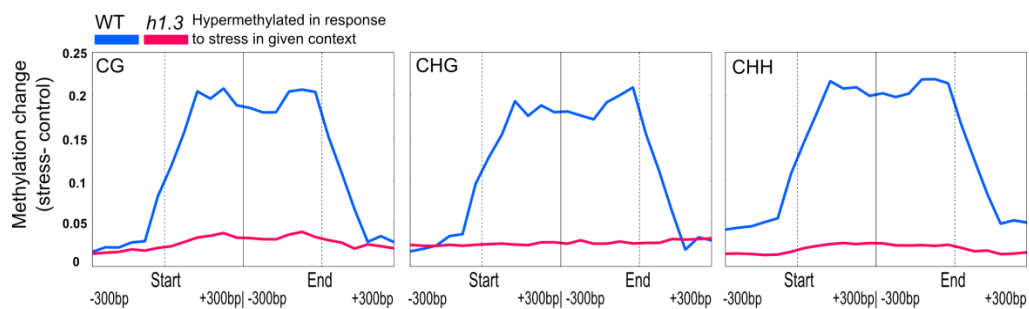

**Figure S20. Methylation changes in response to stress in wild-type (WT<sup>Ler</sup>) and *h1.3* mutant plants. Complementary to [Figure 8B](#).**

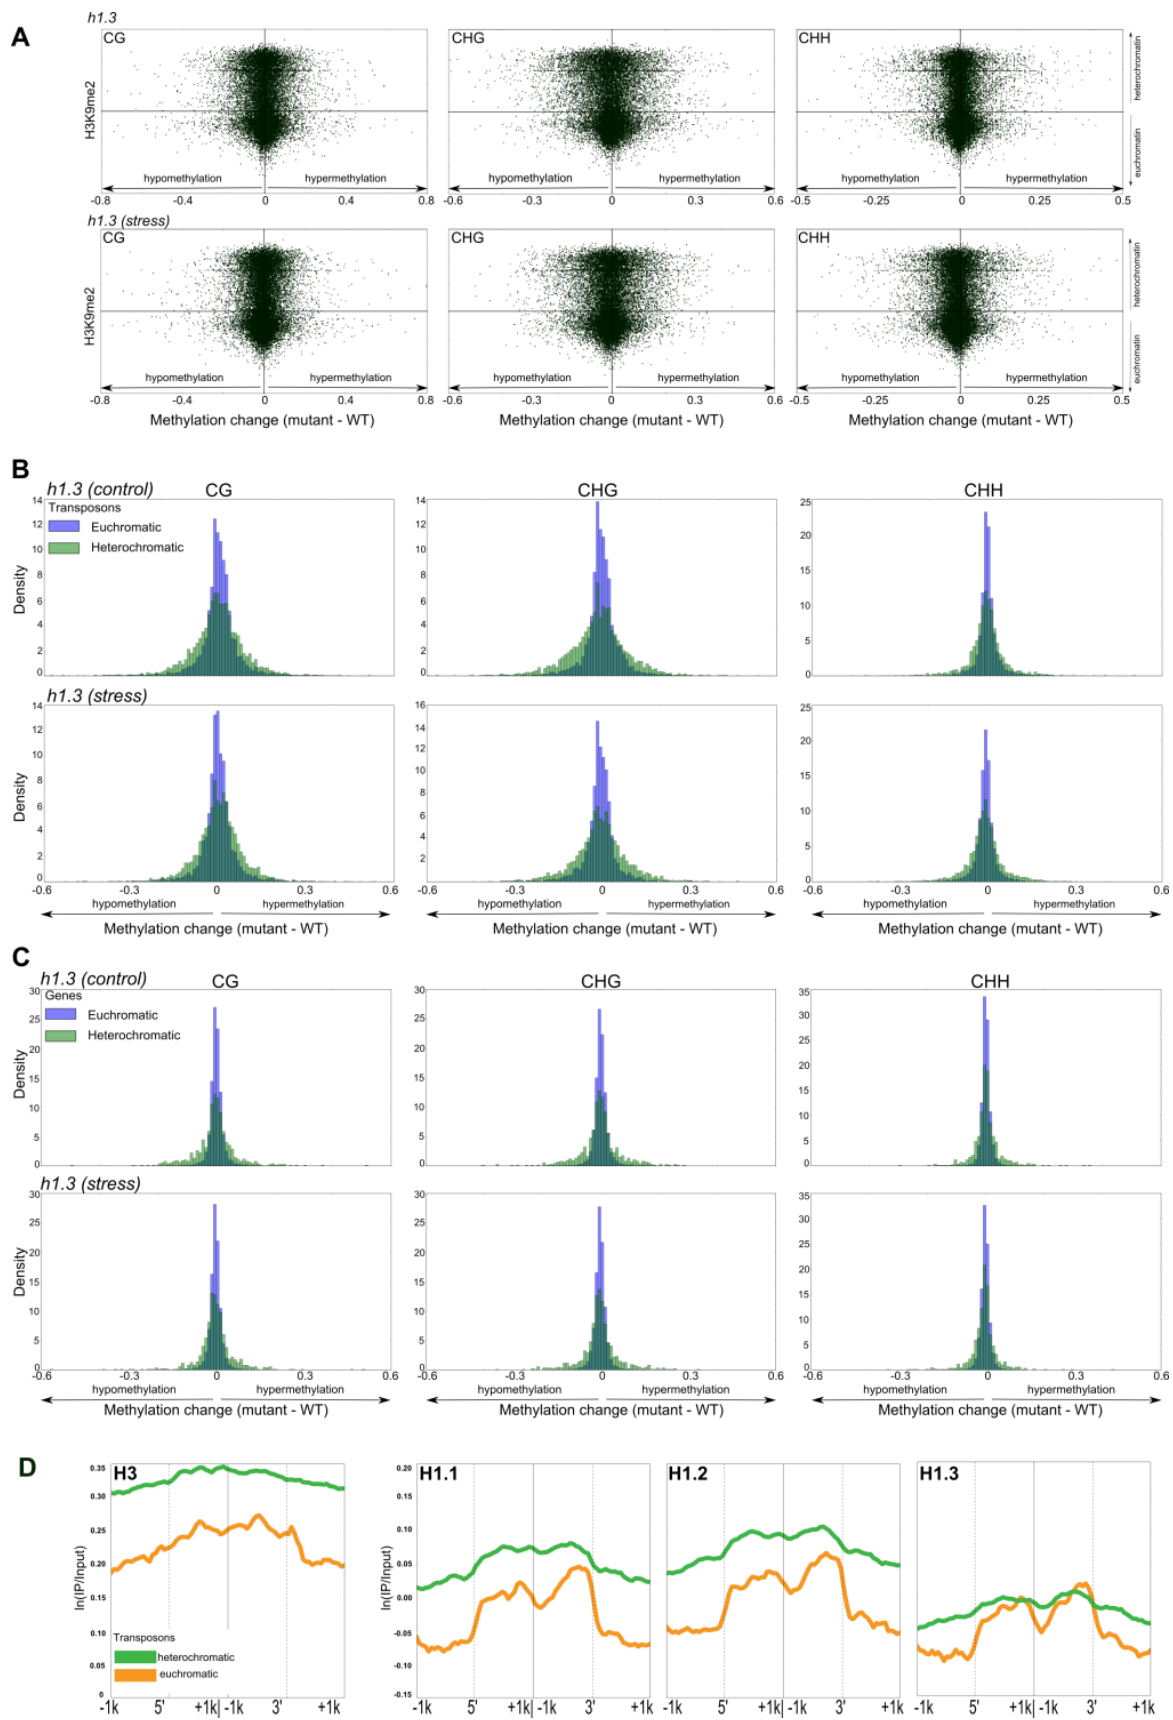

**Figure S21. Global methylation changes in the *h1.3* mutant.**

(A) Density plots of differences in the methylation of euchromatic and heterochromatic transposons in *h1.3* and wild-type plants grown in control or combined low light/drought conditions. For euchromatic transposons, the quintal with the lowest H3K9me2 and for heterochromatic transposons, the quintal with the highest H3K9me2, were selected from all transposons. (B) Kernel density plots of differences in the methylation of euchromatic and heterochromatic transposons in *h1.3* and wild-type plants grown in control or combined low light/drought conditions. For euchromatic transposons, the quintal with the lowest H3K9me2 and for heterochromatic transposons, the quintal with the highest H3K9me2, were selected from all transposons. (C) Kernel density plots of differences in the methylation of euchromatic and heterochromatic genes in *h1.3* and wild-type plants grown in control or combined low light/drought conditions. Euchromatic genes were selected as those with low levels of H3K9me2 and heterochromatic genes as those with high levels of H3K9me2. (D) Distribution of the main H1 variants, H1.3 and H3 in stress conditions across transposons divided between heterochromatin and euchromatin. The average distribution of H1s is plotted around the 3' and 5' ends ( $\pm$  1kb) of TEs. TEs are divided into euchromatic TEs and heterochromatic TEs, according to their level of H3K9me2 occupancy.

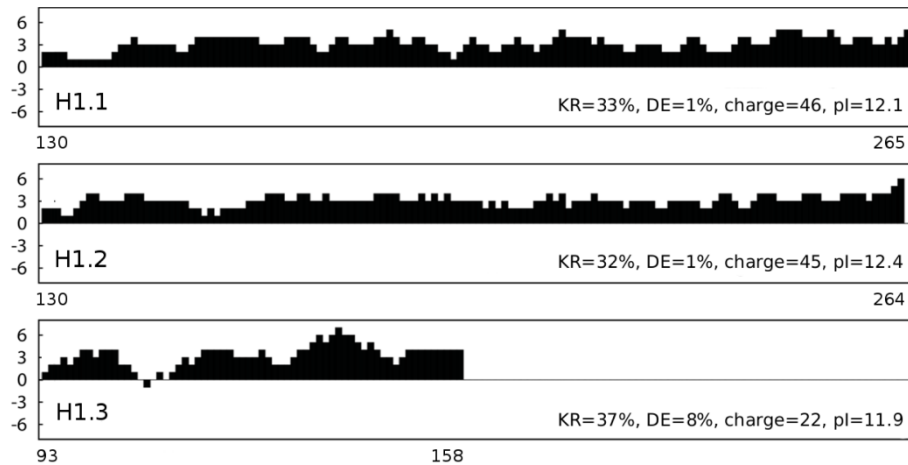

**Figure S22. Moving sum plot of net charge for the C-terminal region of Arabidopsis histone H1 variants.**

The net charge (y-axis) is summed in a 10-aa sliding window, with the position along the CTD denoted on the x-axis. For each CTD, the percentages of both positively (K, R) and negatively (D, E) charged residues, total charge and theoretical isoelectric point (pI, calculated with [http://web.expasy.org/compute\\_pi](http://web.expasy.org/compute_pi)) are also shown. The average charge per unit length is similar for all variants (the same is true for all analyzed species).
