# Supplementary material
Source: PubMed Central journal article supplement (PMC4634048)
Supplement: supp_pp.15.00493_PP2015-00493R1_Supplemental_Materialtbls.pdf [file supp_pp.15.00493_PP2015-00493R1_Supplemental_Materialtbls.pdf]

## Supplementary tables

| Genotype    | Treatment             | Leaf area (mm <sup>2</sup> ) |   | Leaf number |    | Plant height (mm) |   | Fresh weight - FW (mg) |   | Dry weight - DW (mg) |   | RWC (%) |   | Water content (g g(DW) <sup>-1</sup> ) |    | A (mM CO <sub>2</sub> plant <sup>-1</sup> h <sup>-1</sup> ) |   | Fv/Fm |    | fPSII |   | qP    |    | NPQ   |   | SPAD |   |
|-------------|-----------------------|------------------------------|---|-------------|----|-------------------|---|------------------------|---|----------------------|---|---------|---|----------------------------------------|----|-------------------------------------------------------------|---|-------|----|-------|---|-------|----|-------|---|------|---|
|             |                       |                              |   |             |    |                   |   |                        |   |                      |   |         |   |                                        |    |                                                             |   |       |    |       |   |       |    |       |   |      |   |
| WT          | Control               | 403                          | a | 7.0         | a  | 15.38             | a | 103.9                  | a | 10.7                 | a | 82.0    | a | 8.69                                   | a  | 16.25                                                       | a | 0.807 | ab | 0.446 | a | 0.951 | ab | 1.561 | a | 29.0 | a |
| <i>h1.3</i> |                       | 365                          | a | 6.5         | a  | 5.38              | b | 89.5                   | a | 9.3                  | a | 77.4    | b | 8.45                                   | a  | 14.06                                                       | a | 0.817 | ac | 0.456 | a | 0.968 | a  | 1.590 | a | 27.7 | a |
| WT          | Low light/<br>drought | 62                           | b | 5.4         | b  | 6.50              | b | 8.5                    | b | 0.8                  | b | 84.3    | a | 9.69                                   | ab | 1.98                                                        | b | 0.789 | b  | 0.484 | a | 0.882 | c  | 1.027 | b | 19.6 | b |
| <i>h1.3</i> |                       | 142                          | c | 6.3         | ab | 7.38              | b | 18.8                   | c | 1.5                  | c | 78.0    | b | 11.69                                  | b  | 4.49                                                        | c | 0.836 | c  | 0.588 | b | 0.915 | bc | 0.931 | c | 20.6 | b |

**Table S1. Growth analysis and physiological parameters of wild-type (WT) and *h1.3* plants in the early-growth phase experiment.** Homogeneity groups are marked with letters (p<0.05, Tukey's HSD test).

| Genotype         | Treatment         | Leaf area (cm <sup>2</sup> ) |   | Leaf number |   | Plant height (cm) |    | Fresh weight - FW (mg) |   | Dry weight DW (mg) |   | RWC (%) |   | Water content (g (DW) <sup>-1</sup> ) |     | Pn (mM CO <sub>2</sub> plant <sup>-1</sup> h <sup>-1</sup> ) |   | Fv/Fm |     | fPSII |     | qP    |    | NPQ   |   | SPAD |    |
|------------------|-------------------|------------------------------|---|-------------|---|-------------------|----|------------------------|---|--------------------|---|---------|---|---------------------------------------|-----|--------------------------------------------------------------|---|-------|-----|-------|-----|-------|----|-------|---|------|----|
|                  |                   |                              |   |             |   |                   |    |                        |   |                    |   |         |   |                                       |     |                                                              |   |       |     |       |     |       |    |       |   |      |    |
| WT               | Control           | 25                           | a | 25.9        | a | 19.9              | a  | 1797                   | a | 190                | a | 84.9    | a | 8.52                                  | abc | 98.35                                                        | a | 0.845 | a   | 0.670 | abc | 0.949 | ab | 0.731 | a | 39.9 | a  |
| <i>h1.3</i>      |                   | 24                           | a | 30.1        | a | 20.3              | a  | 1648                   | a | 209                | a | 83.2    | a | 8.02                                  | bc  | 63.48                                                        | b | 0.841 | abc | 0.684 | a   | 0.960 | ac | 0.664 | a | 37.5 | ab |
| <i>h1.3/H1.3</i> |                   | 26                           | a | 29.3        | a | 16.6              | b  | 1697                   | a | 188                | a | 86.0    | a | 9.74                                  | ab  | 99.48                                                        | a | 0.834 | c   | 0.687 | a   | 0.976 | c  | 0.673 | a | 38.1 | ab |
| WT               | Drought/low light | 5                            | b | 14.4        | b | 10.7              | c  | 219                    | b | 22                 | b | 72.3    | b | 7.72                                  | c   | 6.75                                                         | c | 0.846 | abc | 0.648 | bcd | 0.923 | d  | 0.842 | b | 33.5 | b  |
| <i>h1.3</i>      |                   | 8                            | c | 18.9        | c | 7.0               | d  | 470                    | c | 34                 | c | 70.2    | c | 7.73                                  | c   | 8.52                                                         | d | 0.846 | abc | 0.642 | cd  | 0.911 | d  | 0.708 | a | 40.6 | a  |
| <i>h1.3/H1.3</i> |                   | 5                            | b | 14.0        | b | 8.8               | cd | 184                    | b | 22                 | b | 72.9    | b | 8.40                                  | bc  | 5.79                                                         | c | 0.839 | abc | 0.627 | d   | 0.928 | bd | 0.850 | b | 33.2 | b  |

**Table S2. Growth analysis and physiological parameters of wild-type (WT) and *h1.3* plants, and the *h1.3* mutant complemented with H1.3-GFP (*h1.3/H1.3*) in the late-growth phase experiment.** Homogeneity groups are indicated by letters (p<0.05, Tukey's HSD test).

| <i>Observation</i>                                                  | <i>H1 subtype</i> | <i>p-value</i>  |
|---------------------------------------------------------------------|-------------------|-----------------|
| H1 <b>enrichment on transposons</b><br>compared to the whole genome | Main variants     | $p < 10^{-167}$ |
|                                                                     | H1.3 LL           | $10^{-27}$      |
| H1 <b>depletion on introns</b><br>compared to the whole genome      | Main variants     | $p < 10^{-166}$ |
|                                                                     | H1.3 LL           | $10^{-87}$      |
| H1 <b>depletion on 5'ends</b><br>compared to whole genes            | Main variants     | $p < 10^{-230}$ |
|                                                                     | H1.3 LL           |                 |
| H1 <b>enrichment on exons</b><br>compared to whole genes            | Main variants     | $p < 10^{-4}$   |
|                                                                     | H1.3 LL           | 0.009           |

**Table S3. Statistics for H1 enrichment and depletion at genic features.** Supplementary to [Figure 5A](#) and [Figure S15](#).

|                                              | DNA methylation context                                                                                         |                                                                                                                   |                                                                                                                  |
|----------------------------------------------|-----------------------------------------------------------------------------------------------------------------|-------------------------------------------------------------------------------------------------------------------|------------------------------------------------------------------------------------------------------------------|
|                                              | CG                                                                                                              | CHG                                                                                                               | CHH                                                                                                              |
| <b>Mutant - WT</b>                           |                                                                                                                 |                                                                                                                   |                                                                                                                  |
| <i>h1.1h1.2h1.3</i>                          | [0.131, 0.151] <sup>a</sup><br>2.009e-26 <sup>b</sup><br>[-0.005, 0.05] <sup>c</sup><br>2.154e-84 <sup>d</sup>  | [0.111, 0.181] <sup>a</sup><br>5.407e-256 <sup>b</sup><br>[-0.021, 0.12] <sup>c</sup><br>0.0 <sup>d</sup>         | [0.068, 0.097] <sup>a</sup><br>1.570e-101 <sup>b</sup><br>[-0.016, 0.012] <sup>c</sup><br>4.966e-70 <sup>d</sup> |
| <i>h1.3 (control)</i>                        | [0.073, 0.091] <sup>a</sup><br>2.483e-66 <sup>b</sup><br>[-0.001, -0.005] <sup>c</sup><br>0.005 <sup>d</sup>    | [0.061, 0.102] <sup>a</sup><br>9.906e-164 <sup>b</sup><br>[-0.001, -0.013] <sup>c</sup><br>1.041e-10 <sup>d</sup> | [0.039, 0.067] <sup>a</sup><br>1.14e-121 <sup>b</sup><br>[0.001, -0.002] <sup>c</sup><br>0.003 <sup>d</sup>      |
| <i>h1.3 (stress)</i>                         | [0.063, 0.081] <sup>a</sup><br>2.75e-75 <sup>b</sup><br>[-0.004, -0.001] <sup>c</sup><br>0.072 <sup>d</sup>     | [0.056, 0.092] <sup>a</sup><br>1.318e-172 <sup>b</sup><br>[-0.007, -0.005] <sup>c</sup><br>0.161 <sup>d</sup>     | [0.042, 0.067] <sup>a</sup><br>1.252e-127 <sup>b</sup><br>[-0.008, -0.008] <sup>c</sup><br>0.808 <sup>d</sup>    |
| <b>Response to stress (Stress - control)</b> |                                                                                                                 |                                                                                                                   |                                                                                                                  |
| <b>WT</b>                                    | [0.052, 0.077] <sup>a</sup><br>1.555e-134 <sup>b</sup><br>[0.007, 0.012] <sup>c</sup><br>4.853e-05 <sup>d</sup> | [0.054, 0.09] <sup>a</sup><br>1.027e-170 <sup>b</sup><br>[0.012, 0.020] <sup>c</sup><br>3.929e-07 <sup>d</sup>    | [0.040, 0.067] <sup>a</sup><br>4.516e-121 <sup>b</sup><br>[0.013, 0.028] <sup>c</sup><br>1.281e-43 <sup>d</sup>  |
| <i>h1.3</i>                                  | [0.059, 0.083] <sup>a</sup><br>1.216e-102 <sup>b</sup><br>[0.004, 0.017] <sup>c</sup><br>1.731e-17 <sup>d</sup> | [0.061, 0.101] <sup>a</sup><br>2.563e-164 <sup>b</sup><br>[0.007, 0.028] <sup>c</sup><br>4.918e-33 <sup>d</sup>   | [0.041, 0.069] <sup>a</sup><br>4.188e-146 <sup>b</sup><br>[0.004, 0.022] <sup>c</sup><br>4.895e-58 <sup>d</sup>  |

**Table S4. Statistics for changes in methylation of euchromatic and heterochromatic transposable elements (TEs).** Euchromatic TEs – 6499 TEs with the lowest H3K9me2 level; heterochromatic TEs – 5188 TEs with the highest H3K9me2 level. Letters indicate the following: a – standard deviations, b – Levene (Brown-Forsythe) test p-value, c – mean values, d – T-test. The first value in brackets is for euchromatic TEs and the second is for heterochromatic TEs.

|                                              | DNA methylation context                                                                                           |                                                                                                                 |                                                                                                                     |
|----------------------------------------------|-------------------------------------------------------------------------------------------------------------------|-----------------------------------------------------------------------------------------------------------------|---------------------------------------------------------------------------------------------------------------------|
|                                              | CG                                                                                                                | CHG                                                                                                             | CHH                                                                                                                 |
| <b>Mutant - WT</b>                           |                                                                                                                   |                                                                                                                 |                                                                                                                     |
| <i>h1.1h1.2h1.3</i>                          | [0.059, 0.138] <sup>a</sup><br>1.799e-159 <sup>b</sup><br>[0.0014, 0.0053] <sup>c</sup><br>0.092 <sup>d</sup>     | [0.047, 0.135] <sup>a</sup><br>0.0 <sup>b</sup><br>[0.0016, 0.0400] <sup>c</sup><br>2.683e-81 <sup>d</sup>      | [0.032, 0.075] <sup>a</sup><br>5.226e-165 <sup>b</sup><br>[0.0010, -0.0040] <sup>c</sup><br>6.924e-05 <sup>d</sup>  |
| <i>h1.3 (control)</i>                        | [0.032, 0.076] <sup>a</sup><br>9.687e-155 <sup>b</sup><br>[-0.0004, -0.0049] <sup>c</sup><br>0.0008 <sup>d</sup>  | [0.027, 0.072] <sup>a</sup><br>1.118e-217 <sup>b</sup><br>[0.0000, -0.0028] <sup>c</sup><br>0.016 <sup>d</sup>  | [0.018, 0.049] <sup>a</sup><br>4.204e-187 <sup>b</sup><br>[-0.0002, 0.0018] <sup>c</sup><br>0.008 <sup>d</sup>      |
| <i>h1.3 (stress)</i>                         | [0.028, 0.069] <sup>a</sup><br>7.868e-152 <sup>b</sup><br>[-0.0028, -0.0021] <sup>c</sup><br>0.566 <sup>d</sup>   | [0.025, 0.067] <sup>a</sup><br>6.684e-247 <sup>b</sup><br>[-0.0032, -0.0038] <sup>c</sup><br>0.581 <sup>d</sup> | [0.019, 0.051] <sup>a</sup><br>2.576e-174 <sup>b</sup><br>[-0.0031, -0.0067] <sup>c</sup><br>3.154e-06 <sup>d</sup> |
| <b>Response to stress (Stress - control)</b> |                                                                                                                   |                                                                                                                 |                                                                                                                     |
| <b>WT</b>                                    | [0.023, 0.053] <sup>a</sup><br>1.387e-177 <sup>b</sup><br>[0.0041, 0.0063] <sup>c</sup><br>0.018 <sup>d</sup>     | [0.023, 0.063] <sup>a</sup><br>2.373e-214 <sup>b</sup><br>[0.005, 0.01] <sup>c</sup><br>1.716e-07 <sup>d</sup>  | [0.019, 0.036] <sup>a</sup><br>2.036e-58 <sup>b</sup><br>[0.0047, 0.0092] <sup>c</sup><br>6.661e-16 <sup>d</sup>    |
| <i>h1.3</i>                                  | [0.026, 0.065] <sup>a</sup><br>1.292e-228 <sup>b</sup><br>[0.0019, 0.0089] <sup>c</sup><br>3.938e-11 <sup>d</sup> | [0.025, 0.071] <sup>a</sup><br>1.088e-237 <sup>b</sup><br>[0.002, 0.009] <sup>c</sup><br>5.322e-12 <sup>d</sup> | [0.019, 0.047] <sup>a</sup><br>7.899e-182 <sup>b</sup><br>[0.0016, 0.0083] <sup>c</sup><br>1.988e-18 <sup>d</sup>   |

**Table S5. Statistics for changes in methylation of euchromatic and heterochromatic genes.**

Euchromatic genes – 17,026 genes with the lowest H3K9me2 level; heterochromatic genes – 1308 genes with the highest H3K9me2 level. Letters indicate the following: a – standard deviations, b – Levene (Brown-Forsythe) test p-value, c – mean values, d – T-test. The first value in brackets is for euchromatic genes and the second is for heterochromatic genes.

| <b>CG</b>          | <b><i>h1.3</i></b> | <b>WT stress</b> | <b><i>h1.3</i> stress</b> |
|--------------------|--------------------|------------------|---------------------------|
| <b>WT</b>          | 0.0008             | 3.2593e-33       |                           |
| <b><i>h1.3</i></b> |                    |                  | 1.6916e-17                |
| <b>WT stress</b>   |                    |                  | 8.9125e-12                |

| <b>CHG</b>         | <b><i>h1.3</i></b> | <b>WT stress</b> | <b><i>h1.3</i> stress</b> |
|--------------------|--------------------|------------------|---------------------------|
| <b>WT</b>          | 9.4357e-18         | 1.5502e-197      |                           |
| <b><i>h1.3</i></b> |                    |                  | 1.9566e-122               |
| <b>WT stress</b>   |                    |                  | 1.0462e-49                |

| <b>CHH</b>         | <b><i>h1.3</i></b> | <b>WT stress</b> | <b><i>h1.3</i> stress</b> |
|--------------------|--------------------|------------------|---------------------------|
| <b>WT</b>          | 0.3106             | <10e-256         |                           |
| <b><i>h1.3</i></b> |                    |                  | <10e-256                  |
| <b>WT stress</b>   |                    |                  | <10e-256                  |

**Table S6. Statistics (T-test) for differences in the average global methylation level between genotypes and conditions in three different DNA methylation contexts. Supplementary to Figure 8A.**

| <b>Name</b>          | <b>Sequence 5'→3'</b>                   | <b>Aim</b>                                                                            |
|----------------------|-----------------------------------------|---------------------------------------------------------------------------------------|
| 156AW_L              | GAAAACCACCACTCATCCTCCATACTTTCA          | <i>h1.3</i><br>genotyping                                                             |
| 157AW_R              | CCTTCTTCACTTTCTCTTCTTTTCTTGTTG<br>TTC   |                                                                                       |
| Ds5-4_R              | TACGATAACGGTTCGGTACGG                   |                                                                                       |
| 164AW_ins-L          | TTCTTTTGATTTATAAGGGATTTTGCCGATT<br>T    | <i>h1.1</i><br>genotyping                                                             |
| 165AW_gen_R          | CAGTCTTAGGTTTAACGGCGATTGTTTTCTT         |                                                                                       |
| 166AW_gen_L          | AAACGAATTTTCATCGAGTATATCACGAGTT<br>ATGG |                                                                                       |
| 167AW_gen_L          | CGTTACAATCGCATCTTTAATCATCTGCAT<br>C     | <i>h1.2</i><br>genotyping                                                             |
| 168AW_ins_R          | CATCATACTCATTGCTGATCCATGTAGATT<br>TCC   |                                                                                       |
| 169AW_gen_R          | GCACACCAATACAATACACAAAAGCACCT<br>ATC    |                                                                                       |
| 13MP_H1.3_SalI_L     | GTCGACAAGTCATGCAGAACTCCATTG             | Cloning the<br>promoter<br>and coding<br>region<br>(without<br>stop codon)<br>of H1.3 |
| 14MP_H1.3_BamHI_R    | <u>GGATCC</u> AGCAGCGGAAGCTTTCATG       |                                                                                       |
| 19MP_H1.3utr_EcoRI_L | <u>GAATTC</u> TGATCACTGAGGAGGAGGAG      | Cloning the<br>3'UTR of<br>H1.3                                                       |
| 10MP_H1.3utr_NcoI_R  | <u>CCATGG</u> ACGAGACTTTGGGAGCAAGA      |                                                                                       |
| H1.1qPCR3-R          | CCCTAAGGCGGCAGCGGAGA                    | qPCR,<br>expression<br>of H1.1                                                        |
| H1.1qPCR3-L          | GCAGTGGCACGAGGAACGGG                    |                                                                                       |
| H1.2_qPCR_L          | GTCTGTTGCTGCTGTTTCCA                    | qPCR,<br>expression<br>of H1.2                                                        |
| H1.2_qPCR_R          | CCGGAGCCTTCTTAGTCACA                    |                                                                                       |
| H1.3_qPCR_L          | CGGATCAAGCCCTTATGCTA                    | qPCR,<br>expression<br>of H1.3                                                        |
| H1.3_qPCR_R          | CCTGCTGCCTCGTTATCATC                    |                                                                                       |
| ml83_SPCH_F          | TAAGCCCAAGAAAACCGCCT                    | qPCR,<br>expression<br>of SPCH                                                        |
| ml84_SPCH_R          | ATGAGTGGTAGTTGCGGTGG                    |                                                                                       |
| ml85_MKK7/MKK9_F     | ATTTTCCTTTGCTTCCGCCG                    | qPCR,<br>expression<br>of<br>MKK7/MK<br>K9                                            |
| ml86_MKK7/MKK9_R     | GCGGTTCTCCAAAACACACC                    |                                                                                       |
| ml91_TMM_F           | TAAGCCCAAGAAAACCGCCT                    | qPCR,<br>expression<br>of TMM                                                         |
| ml92_TMM_R           | ATGAGTGGTAGTTGCGGTGG                    |                                                                                       |
| ml99_JAZ1_F          | TTCGTCGGTAGCCGGAGATT                    | qPCR,<br>expression                                                                   |
| ml100_JAZ1_R         | CGTGAGTTGCCTAAAGTTCCA                   |                                                                                       |

|                |                        |                                  |
|----------------|------------------------|----------------------------------|
|                |                        | of JAZ1                          |
| ml101_EXPA11_F | GCCGCTCTTTTTATTGCGGT   | qPCR,<br>expression<br>of EXPA11 |
| ml102_EXPA11_R | GCTCCACCCATTGTTCCAGA   |                                  |
| ml105_CSLA03_F | AGTTGTGGCAGAGAAGAAAGC  | qPCR,<br>expression<br>of CSLA03 |
| ml106_CSLA03_R | CCACAGGACTTGAAACCAACC  |                                  |
| ml107_AGP21_F  | CCAAGCCCAACTTCTGATGC   | qPCR,<br>expression<br>of AGP21  |
| ml108_AGP21_R  | ACCAGATGCCAAAGCAACAA   |                                  |
| ml109_WAKL10_F | GACATCCCGTACCCGTTTGG   | qPCR,<br>expression<br>of WAKL10 |
| ml110_WAKL10_R | CCTACGTAAAGAACCGGCGA   |                                  |
| ml113_EXPA6_F  | GGCAATGTTGGGCTTGGTTT   | qPCR,<br>expression<br>of EXPA6  |
| ml114_EXPA6_R  | ACCGTAGAAAGTGGCGTGAG   |                                  |
| ml115_FAD3_F   | CATCAAACCCTTCTTCACCAC  | qPCR,<br>expression<br>of FAD3   |
| ml116_FAD3_R   | G TTCACATTGGTGC GTTGGT |                                  |
| ml117_ERF38_F  | AGACGACGGAGAGAAGAGTG   | qPCR,<br>expression<br>of ERF38  |
| ml118_ERF38_R  | TGGAGAAAGTACCGAGCCAG   |                                  |
| ml119_ANNAT4_F | ATACTGCGGTGGTGATGTGG   | qPCR,<br>expression<br>of ANNAT4 |
| ml120_ANNAT4_R | TGTGCATGAGACCTCAACGA   |                                  |
| ml121_CA1_F    | CCTGCTCCTATCATTGCCCC   | qPCR,<br>expression<br>of CA1    |
| ml122_CA1_R    | GCTGTGATCTGCTCCACCTT   |                                  |
| ml125_FAD5_F   | CAGCGACGGAGGGAGATTAC   | qPCR,<br>expression<br>of FAD5   |
| ml126_FAD5_R   | GCCCAAAGCAACCGAAACA    |                                  |
| ml129_CWLP_F   | TTGCGACTGTACCCCTCCTA   | qPCR,<br>expression<br>of CWLP   |
| ml130_CWLP_R   | AGGCGGTTTGACTGGATGTT   |                                  |
| ml131_CSLG2_F  | AAAAACCAGTTGCCTTCCGT   | qPCR,<br>expression<br>of CSLG2  |
| ml132_CSLG2_R  | CTGTATGGAATGGTTCGCCG   |                                  |
| ml133_FAD6_F   | ACTCTCGCCTTCCTACCACT   | qPCR,<br>expression<br>of FAD6   |
| ml134_FAD6_R   | TCAAACCTCTTGCGGAAC     |                                  |
| ml135_HCF136_F | TCAATGGCGTCTCTGCAACT   | qPCR,<br>expression<br>of HCF136 |
| ml136_HCF136_R | ATTGGTACAGAAGCTCCCGC   |                                  |
| ml137_G6PD1_F  | AGGGCGTGGAGGTTACTTTG   | qPCR,<br>expression<br>of G6PD1  |
| ml138_G6PD1_R  | CCACATCTTCAAGCCGCAAC   |                                  |
| ml139_RBCS3B_F | CGAGTTAGAGCACGGAAACACT | qPCR,<br>expression<br>of RBCS3B |
| ml140_RBCS3B_R | ATTGGACTTGACGGGTGTTGT  |                                  |
| ml141_RBCS1B_F | GACAACACCCGTCAAGTCCA   | qPCR,                            |



|                       |                         |                               |
|-----------------------|-------------------------|-------------------------------|
| ml142_RBCS1B_R        | TGGGTTCCGGATAGTCAACATT  | expression of RBCS1B          |
| ml143_GAMT2_F         | TACAACGGCGATACTACTGCC   | qPCR, expression of GAMT2     |
| ml144_GAMT2_R         | CTCTGGGAAAAAGCCGGTCA    |                               |
| ml145_ABI2_F          | TCGCTGTTCCATTTCAGACCA   | qPCR, expression of ABI2      |
| ml146_ABI2_R          | CGCCAGAACAAGAACTTTCCG   |                               |
| ml147_AGP1_F          | TCTTCCGCAGTGGCTCAATC    | qPCR, expression of AGP1      |
| ml148_AGP1_R          | GAGCCGGTGAGATCCGTCTA    |                               |
| ml149_ANNAT2_F        | GTGCGTCTGCTTCGTCTCA     | qPCR, expression of ANNAT2    |
| ml150_ANNAT2_R        | TGAGAGACGCCATTGTTGGG    |                               |
| ml151_XTH6_F          | GTTTCATTCCGGGTTTCCGCTC  | qPCR, expression of XTH6      |
| ml152_XTH6_R          | ATGTGAGATTCCGACCAGGC    |                               |
| ml155_COR27_F         | GGTAACGGATGAGCCCGAAA    | qPCR, expression of COR27     |
| ml156_COR27_R         | CAACGCTGATTTGGTCGTGG    |                               |
| ml157_COR15B_F        | GCCAATGAAACTGCGACTGA    | qPCR, expression of COR15B    |
| ml158_COR15B_R        | TGAATCAGGACTTTGTGGCA    |                               |
| ml161_AT4G30650_F     | GGCGAGCAACATGGAAGTTTT   | qPCR, expression of AT4G30650 |
| ml162_AT4G30650_R     | TGCAACAGCCACGTTTGAGA    |                               |
| ml163_MUTE_L          | CGAAAGACCCTAAACCGACCA   | qPCR, expression of MUTE      |
| ml164_MUTE_R          | GGTAGTGGCGGCTCCTAAAC    |                               |
| ml165_CYCA2,3_L       | CCCCAAAGAGCGGATTCAGG    | qPCR, expression of CYCA2,3   |
| ml166_CYCA2,3_R       | TGGCCGAGACACAGCATTTT    |                               |
| 183KR_FAMA_qPCR_L     | AGACTGCGGAGAACAAGTCG    | qPCR, expression of FAMA      |
| 184KR_FAMA_qPCR_R     | TCTTAATCAGCTGTCCCGGC    |                               |
| 207KR_ERECTA_qPCR_R_L | CGTGGAACGTAACCGGAGAA    | qPCR, expression of ERECTA    |
| 208KR_ERECTA_qPCR_R_R | ATGATCGATGCTTGGTCCCC    |                               |
| ml1_UBC_F             | CTGCGACTCAGGGAATCTTCTAA | qPCR, expression of UBC       |
| ml2_UBC_R             | TTGTGCCATTGAATTGAACCC   |                               |

**Table S7. Sequences of oligonucleotide primers used in this study.** Restriction enzyme sites are underlined.
